# Supplementary material for: Global survival trends for brain tumors, by histology: Analysis of individual records for 67,776 children diagnosed in 61 countries during 2000–2014 (CONCORD-3)
Source: PubMed Central journal article supplement — Neuro Oncol. 2022 Oct 10;25(3):593–606. doi: 10.1093/neuonc/noac232 (PMC10013647; doi:10.1093/neuonc/noac232), 2022-10-10
Supplement: noac232_suppl_supplementary_table_s1.pdf [file noac232_suppl_supplementary_table_s1.pdf]

Supplementary Table 1. Histology groupings for brain tumours in children (0-14 years).

| International Classification of Childhood Cancer<br>Third Edition (ICCC-3) |                                                                    | ICD-O-3 morphology definition (sections 938-952)                                                                                                                                                                                                                                                                                                                             | ICD-O-3<br>morphology<br>code                                                                              |
|----------------------------------------------------------------------------|--------------------------------------------------------------------|------------------------------------------------------------------------------------------------------------------------------------------------------------------------------------------------------------------------------------------------------------------------------------------------------------------------------------------------------------------------------|------------------------------------------------------------------------------------------------------------|
| Second Tier                                                                | Morphology groupings<br>used in the study (adapted<br>from ICCC-3) |                                                                                                                                                                                                                                                                                                                                                                              |                                                                                                            |
| Ependymoma and<br>choroid plexus<br>tumour (IIIa)                          | Ependymoma                                                         | Subependymoma<br>Ependymoma, NOS<br>Papillary ependymoma<br>Myxopapillary ependymoma                                                                                                                                                                                                                                                                                         | 9383/1<br>9391/3<br>9393/3<br>9394/1                                                                       |
|                                                                            | Choroid plexus tumour                                              | Choroid plexus papilloma, NOS<br>Atypical choroid plexus papilloma<br>Choroid plexus carcinoma                                                                                                                                                                                                                                                                               | 9390/0<br>9390/1<br>9390/3                                                                                 |
| Astrocytoma (IIIb)                                                         | Astrocytoma, WHO grade I<br>and II                                 | Subependymal giant cell astrocytoma<br>Astrocytoma NOS<br>Protoplasmic astrocytoma<br>Gemistocytic astrocytoma<br>Fibrillary astrocytoma<br>Astrocytoma NOS<br>Pilocytic astrocytoma<br>Pilomyxoid astrocytoma<br>Polar spongioblastoma<br>Pleomorphic xanthoastrocytoma                                                                                                     | 9384/1<br>9400/32<br>9410/3<br>9411/3<br>9420/3<br>9400/31<br>9421/1<br>9425/3<br>9423/3<br>9424/3         |
|                                                                            | Astrocytoma, WHO grade III<br>and IV                               | Astrocytoma NOS<br>Astrocytoma, anaplastic<br>Astrocytoma NOS<br>Glioblastoma, NOS<br>Giant cell glioblastoma<br>Gliosarcoma                                                                                                                                                                                                                                                 | 9400/33<br>9401/3<br>9400/34<br>9440/3<br>9441/3<br>9442/3                                                 |
|                                                                            | Unspecified astrocytoma                                            | Astrocytoma NOS                                                                                                                                                                                                                                                                                                                                                              | 9400/39                                                                                                    |
| Embryonal tumour<br>(IIIc)                                                 | Medulloblastoma                                                    | Medulloblastoma, NOS<br>Desmoplastic nodular medulloblastoma<br>Medullomyoblastoma<br>Large cell medulloblastoma<br>Cerebellar sarcoma, NOS (obs.)                                                                                                                                                                                                                           | 9470/3<br>9471/3<br>9472/3<br>9474/3<br>9480/3                                                             |
|                                                                            | Other and unspecified<br>embryonal tumour                          | Peripheral neuroectodermal tumour<br>Primitive neuroectodermal tumour, NOS<br>Neuroblastoma, NOS<br>Ganglioneuroblastoma<br>Medulloepithelioma, NOS<br>Ependymoma, anaplastic<br>Atypical teratoid / rhabdoid tumour                                                                                                                                                         | 9364/3<br>9473/3<br>9500/3<br>9490/3<br>9501/3<br>9392/3<br>9508/3                                         |
| Other glioma (III d)                                                       | Oligodendroglial tumour                                            | Mixed Glioma<br>Oligodendroglioma, NOS<br>Oligodendroglioma, anaplastic<br>Oligodendroblastoma (obs.)                                                                                                                                                                                                                                                                        | 9382/3<br>9450/3<br>9451/3<br>9460/3                                                                       |
|                                                                            | Unspecified glioma                                                 | Glioma, malignant                                                                                                                                                                                                                                                                                                                                                            | 9380/3                                                                                                     |
|                                                                            | Neuroepithelial glial tumour<br>of uncertain origin                | Gliomatosis cerebri<br>Astroblastoma<br>Chordoid glioma                                                                                                                                                                                                                                                                                                                      | 9381/3<br>9430/3<br>9444/1                                                                                 |
| Other specified<br>neoplasm (IIIe)                                         | Neuronal and mixed<br>neuronal-glioma tumour                       | Paraganglioma, NOS<br>Desmoplastic infantile astrocytoma<br>Dysembryoblastic neuroepithelial tumour<br>Angiocentric glioma<br>Gliofibroma<br>Gangliocytoma<br>Dysplastic gangliocytoma of cerebellum<br>Ganglioglioma, NOS<br>Ganglioglioma, anaplastic<br>Central neurocytoma<br>Papillary glioneuronal tumour                                                              | 8680/1<br>9412/1<br>9413/0<br>9431/1<br>9442/1<br>9492/0<br>9493/0<br>9505/1<br>9505/3<br>9506/1<br>9509/1 |
| Unspecified<br>neoplasm (III f)                                            | Unspecified neoplasm                                               | Neoplasm, benign<br>Neoplasm, uncertain whether benign or malignant<br>Neoplasm, malignant<br>Tumor cells, benign<br>Tumor cells, uncertain whether benign or malignant<br>Tumor cells, malignant<br>Malignant tumor, small cell type<br>Malignant tumor, giant cell type<br>Malignant tumor, spindle cell type<br>Clear cell tumor, NOS<br>Malignant tumor, clear cell type | 8000/0<br>8000/1<br>8000/3<br>8001/0<br>8001/1<br>8001/3<br>8002/3<br>8003/3<br>8004/3<br>8005/3<br>8005/3 |

ICD-O-3: International Classification of Diseases for Oncology  
NOS: not otherwise specified
