# Supplementary material for: Global survival trends for brain tumors, by histology: Analysis of individual records for 67,776 children diagnosed in 61 countries during 2000–2014 (CONCORD-3)
Source: PubMed Central journal article supplement — Neuro Oncol. 2022 Oct 10;25(3):593–606. doi: 10.1093/neuonc/noac232 (PMC10013647; doi:10.1093/neuonc/noac232), 2022-10-10
Supplement: noac232_suppl_supplementary_table_s2.pdf [file noac232_suppl_supplementary_table_s2.pdf]

Supplementary Table 2. Data quality indicators, children (0-14 years) diagnosed with a brain tumour during 2000-2014, by continent and country.

|                                    | Calendar period | Patients submitted | Ineligible (%) <sup>‡</sup> |            |             | Eligible patients | Exclusions (%) <sup>‡</sup> |             | Available for analysis | Data quality indicators (%) <sup>φ</sup> |                         |                   |             |
|------------------------------------|-----------------|--------------------|-----------------------------|------------|-------------|-------------------|-----------------------------|-------------|------------------------|------------------------------------------|-------------------------|-------------------|-------------|
|                                    |                 |                    | Incomplete dates            | In situ    | Other       |                   | DCO                         | Other       |                        | MV                                       | Non-specific morphology | Lost to follow-up | Censored    |
| <b>AFRICA</b>                      |                 | <b>440</b>         | <b>10.7</b>                 | <b>0.0</b> | <b>39.3</b> | <b>220</b>        | <b>6.8</b>                  | <b>11.8</b> | <b>179</b>             | <b>88.8</b>                              | <b>26.3</b>             | <b>1.1</b>        | <b>36.9</b> |
| Algerian registries                | 2000-2014       | 323                | 2.5                         | 0.0        | 53.6        | 142               | 7.7                         | 15.5        | 109                    | 90.8                                     | 33.0                    | 0.0               | 17.4        |
| Mauritius*                         | 2010-2012       | 5                  | 0.0                         | 0.0        | 0.0         | 5                 | 0.0                         | 40.0        | 3                      | 100.0                                    | 0.0                     | 0.0               | 0.0         |
| Nigeria (Ibadan)                   | 2005-2014       | 89                 | 43.8                        | 0.0        | 0.0         | 50                | 8.0                         | 2.0         | 45                     | 88.9                                     | 11.1                    | 0.0               | 71.1        |
| South Africa (Eastern Cape)        | 2002-2014       | 23                 | 0.0                         | 0.0        | 0.0         | 23                | 0.0                         | 4.3         | 22                     | 77.3                                     | 27.3                    | 9.1               | 68.2        |
| <b>AMERICA (CENTRAL AND SOUTH)</b> |                 | <b>5,526</b>       | <b>2.4</b>                  | <b>0.0</b> | <b>1.2</b>  | <b>5,328</b>      | <b>5.9</b>                  | <b>1.1</b>  | <b>4,958</b>           | <b>91.1</b>                              | <b>11.5</b>             | <b>2.6</b>        | <b>12.6</b> |
| Argentinian registries             | 2000-2013       | 2,958              | 0.0                         | 0.0        | 0.0         | 2,957             | 9.2                         | 0.7         | 2,662                  | 88.2                                     | 15.9                    | 0.0               | 16.7        |
| Brazilian registries               | 2000-2014       | 202                | 0.0                         | 0.0        | 0.0         | 202               | 5.0                         | 1.0         | 190                    | 93.2                                     | 10.5                    | 0.0               | 1.6         |
| Chilean registries                 | 2000-2012       | 88                 | 0.0                         | 0.0        | 0.0         | 88                | 1.1                         | 4.5         | 83                     | 78.3                                     | 13.3                    | 0.0               | 16.9        |
| Colombian registries               | 2000-2014       | 267                | 1.9                         | 0.0        | 1.5         | 258               | 2.7                         | 3.1         | 243                    | 88.5                                     | 11.9                    | 0.0               | 17.3        |
| Costa Rica*                        | 2002-2014       | 163                | 0.0                         | 0.0        | 0.6         | 162               | 1.9                         | 3.7         | 153                    | 82.4                                     | 23.5                    | 0.0               | 0.0         |
| Ecuadorian registries              | 2000-2013       | 389                | 10.3                        | 0.0        | 0.3         | 348               | 4.0                         | 2.9         | 324                    | 88.9                                     | 12.7                    | 0.9               | 9.6         |
| Guadeloupe (France)                | 2008-2013       | 14                 | 0.0                         | 0.0        | 0.0         | 14                | 0.0                         | 0.0         | 14                     | 100.0                                    | 0.0                     | 0.0               | 50.0        |
| Martinique (France)                | 2000-2012       | 20                 | 0.0                         | 0.0        | 0.0         | 20                | 0.0                         | 0.0         | 20                     | 100.0                                    | 0.0                     | 0.0               | 25.0        |
| Mexico*                            | 2008-2014       | 1,185              | 6.6                         | 0.0        | 5.0         | 1,048             | 0.0                         | 0.1         | 1,047                  | 99.7                                     | 0.0                     | 12.1              | 7.4         |
| Puerto Rico*                       | 2000-2011       | 240                | 3.8                         | 0.0        | 0.0         | 231               | 2.6                         | 1.3         | 222                    | 99.1                                     | 4.5                     | 0.0               | 0.0         |
| <b>AMERICA (NORTH)</b>             |                 | <b>29,121</b>      | <b>0.6</b>                  | <b>0.0</b> | <b>0.4</b>  | <b>28,848</b>     | <b>0.5</b>                  | <b>3.7</b>  | <b>27,643</b>          | <b>97.5</b>                              | <b>3.3</b>              | <b>2.8</b>        | <b>0.1</b>  |
| Canadian registries                | 2000-2014       | 2,268              | 0.1                         | 0.0        | 0.2         | 2,260             | 0.5                         | 2.3         | 2,196                  | 91.1                                     | 9.2                     | 0.0               | 0.0         |
| US registries                      | 2000-2014       | 26,853             | 0.6                         | 0.0        | 0.4         | 26,588            | 0.5                         | 3.8         | 25,447                 | 98.1                                     | 2.8                     | 3.0               | 0.1         |
| <b>ASIA</b>                        |                 | <b>8,994</b>       | <b>0.5</b>                  | <b>0.0</b> | <b>0.5</b>  | <b>8,909</b>      | <b>1.7</b>                  | <b>3.1</b>  | <b>8,481</b>           | <b>88.0</b>                              | <b>10.4</b>             | <b>0.9</b>        | <b>1.0</b>  |
| Chinese registries                 | 2003-2013       | 540                | 0.0                         | 0.2        | 0.2         | 538               | 2.0                         | 0.2         | 526                    | 57.0                                     | 47.3                    | 7.4               | 0.2         |
| Cyprus*                            | 2004-2014       | 20                 | 0.0                         | 0.0        | 0.0         | 20                | 10.0                        | 20.0        | 14                     | 85.7                                     | 14.3                    | 0.0               | 0.0         |
| Indian registries                  | 2000-2014       | 31                 | 0.0                         | 0.0        | 0.0         | 31                | 0.0                         | 19.4        | 25                     | 80.0                                     | 20.0                    | 4.0               | 0.0         |
| Israel*                            | 2000-2013       | 879                | 0.0                         | 0.0        | 0.9         | 871               | 2.8                         | 0.5         | 843                    | 96.7                                     | 4.3                     | 0.0               | 0.0         |
| Japanese registries                | 2000-2014       | 1,409              | 0.6                         | 0.0        | 0.6         | 1,392             | 6.4                         | 0.7         | 1,293                  | 88.3                                     | 11.9                    | 0.0               | 2.4         |
| Jordan*                            | 2000-2014       | 534                | 0.0                         | 0.0        | 0.2         | 533               | 0.6                         | 7.7         | 489                    | 98.4                                     | 4.3                     | 6.1               | 0.0         |
| South Korea*                       | 2000-2014       | 2,381              | 0.6                         | 0.0        | 0.0         | 2,366             | 0.0                         | 1.4         | 2,333                  | 89.0                                     | 11.7                    | 0.0               | 0.0         |
| Kuwait*                            | 2000-2013       | 57                 | 0.0                         | 0.0        | 0.0         | 57                | 8.8                         | 5.3         | 49                     | 100.0                                    | 0.0                     | 2.0               | 0.0         |
| Malaysia (Penang)                  | 2000-2013       | 53                 | 0.0                         | 0.0        | 0.0         | 53                | 0.0                         | 15.1        | 45                     | 100.0                                    | 0.0                     | 0.0               | 0.0         |
| Qatar*                             | 2000-2014       | 44                 | 0.0                         | 2.3        | 0.0         | 43                | 0.0                         | 23.3        | 33                     | 93.9                                     | 12.1                    | 0.0               | 33.3        |
| Singapore*                         | 2000-2014       | 224                | 0.0                         | 0.0        | 0.0         | 224               | 0.4                         | 12.1        | 196                    | 92.3                                     | 2.6                     | 0.0               | 0.0         |
| Taiwan*                            | 2000-2014       | 1,215              | 0.1                         | 0.0        | 0.0         | 1,214             | 0.0                         | 0.2         | 1,211                  | 83.9                                     | 0.2                     | 0.0               | 0.1         |
| Thai registries                    | 2000-2014       | 469                | 0.0                         | 0.0        | 0.0         | 469               | 3.6                         | 14.3        | 385                    | 84.7                                     | 15.3                    | 0.0               | 2.3         |
| Turkish registries                 | 2000-2013       | 1,138              | 1.4                         | 0.0        | 2.1         | 1,098             | 0.2                         | 5.2         | 1,039                  | 93.6                                     | 7.0                     | 0.6               | 2.7         |
| <b>EUROPE</b>                      |                 | <b>25,606</b>      | <b>0.0</b>                  | <b>0.0</b> | <b>0.7</b>  | <b>25,423</b>     | <b>0.4</b>                  | <b>2.0</b>  | <b>24,802</b>          | <b>92.9</b>                              | <b>4.8</b>              | <b>1.3</b>        | <b>3.3</b>  |
| Austria*                           | 2000-2014       | 486                | 0.0                         | 0.0        | 0.6         | 483               | 0.6                         | 7.3         | 445                    | 98.0                                     | 8.5                     | 0.0               | 0.0         |
| Belarus*                           | 2000-2014       | 626                | 0.0                         | 0.0        | 0.0         | 626               | 0.8                         | 6.5         | 580                    | 93.8                                     | 7.2                     | 1.7               | 0.0         |
| Belgium*                           | 2004-2014       | 782                | 0.0                         | 0.0        | 0.0         | 782               | 0.1                         | 0.0         | 781                    | 97.3                                     | 3.1                     | 2.8               | 0.0         |
| Croatia*                           | 2000-2014       | 414                | 0.0                         | 0.0        | 0.2         | 413               | 1.0                         | 1.5         | 403                    | 74.9                                     | 7.4                     | 0.0               | 0.0         |
| Czech Republic*                    | 2000-2014       | 555                | 0.0                         | 0.0        | 0.0         | 555               | 2.9                         | 9.0         | 489                    | 84.0                                     | 3.3                     | 0.0               | 0.0         |
| Denmark*                           | 2000-2014       | 494                | 0.0                         | 0.0        | 0.2         | 493               | 0.0                         | 0.0         | 493                    | 88.4                                     | 32.9                    | 0.8               | 0.0         |
| Estonia*                           | 2000-2012       | 108                | 0.0                         | 0.0        | 0.0         | 108               | 0.0                         | 4.6         | 103                    | 87.4                                     | 0.0                     | 1.9               | 0.0         |
| Finland*                           | 2000-2014       | 519                | 0.8                         | 0.0        | 0.2         | 514               | 0.6                         | 1.6         | 503                    | 98.0                                     | 0.8                     | 0.8               | 0.0         |
| French registries                  | 2000-2010       | 4,483              | 0.0                         | 0.0        | 0.1         | 4,477             | 0.0                         | 0.0         | 4,477                  | 98.8                                     | 1.6                     | 0.0               | 2.7         |
| German registries                  | 2000-2014       | 757                | 0.0                         | 0.0        | 3.0         | 734               | 2.9                         | 3.0         | 691                    | 94.5                                     | 1.2                     | 0.0               | 20.1        |
| Greece*                            | 2010-2014       | 246                | 0.8                         | 0.0        | 0.0         | 244               | 0.0                         | 2.9         | 237                    | 99.2                                     | 0.8                     | 4.6               | 0.0         |
| Iceland*                           | 2000-2014       | 35                 | 0.0                         | 0.0        | 0.0         | 35                | 0.0                         | 0.0         | 35                     | 88.6                                     | 11.4                    | 0.0               | 0.0         |
| Ireland*                           | 2000-2013       | 417                | 0.0                         | 0.0        | 0.2         | 416               | 0.2                         | 4.6         | 396                    | 83.8                                     | 0.5                     | 0.0               | 0.0         |
| Italian registries                 | 2000-2014       | 1,642              | 0.0                         | 0.2        | 0.0         | 1,638             | 0.1                         | 1.4         | 1,613                  | 83.3                                     | 17.9                    | 1.2               | 1.7         |
| Latvia*                            | 2000-2014       | 157                | 0.0                         | 0.0        | 13.4        | 136               | 0.0                         | 2.9         | 132                    | 76.5                                     | 24.2                    | 0.0               | 0.0         |
| Lithuania*                         | 2000-2012       | 143                | 0.0                         | 0.0        | 0.7         | 142               | 3.5                         | 0.7         | 136                    | 80.1                                     | 0.0                     | 0.0               | 0.0         |
| Malta*                             | 2000-2013       | 28                 | 0.0                         | 0.0        | 0.0         | 28                | 7.1                         | 7.1         | 24                     | 100.0                                    | 0.0                     | 0.0               | 0.0         |
| Netherlands*                       | 2000-2014       | 1,447              | 0.0                         | 0.0        | 0.1         | 1,445             | 0.3                         | 0.9         | 1,428                  | 96.5                                     | 3.6                     | 1.2               | 0.0         |
| Norway*                            | 2000-2014       | 560                | 0.0                         | 0.0        | 8.0         | 515               | 0.2                         | 5.8         | 484                    | 97.5                                     | 7.0                     | 0.4               | 0.0         |
| Poland*                            | 2000-2014       | 2,128              | 0.0                         | 0.0        | 0.0         | 2,128             | 0.9                         | 1.8         | 2,071                  | 89.1                                     | 0.2                     | 0.0               | 0.0         |
| Portugal*                          | 2000-2014       | 563                | 0.2                         | 0.0        | 0.7         | 558               | 0.0                         | 1.6         | 549                    | 93.1                                     | 2.4                     | 1.6               | 0.0         |
| Romania (Cluj)                     | 2006-2012       | 21                 | 0.0                         | 0.0        | 0.0         | 21                | 0.0                         | 9.5         | 19                     | 89.5                                     | 10.5                    | 0.0               | 0.0         |
| Russian registries                 | 2000-2014       | 443                | 0.0                         | 0.0        | 12.0        | 390               | 0.5                         | 15.6        | 327                    | 91.7                                     | 4.0                     | 3.4               | 4.9         |
| Slovakia*                          | 2000-2010       | 330                | 0.0                         | 0.0        | 0.0         | 330               | 2.1                         | 0.0         | 323                    | 92.0                                     | 8.0                     | 0.0               | 0.0         |
| Slovenia*                          | 2000-2013       | 116                | 0.0                         | 0.0        | 1.7         | 114               | 0.0                         | 0.0         | 114                    | 93.0                                     | 0.0                     | 0.0               | 0.0         |
| Spanish registries                 | 2000-2014       | 1,546              | 0.1                         | 0.0        | 0.1         | 1,544             | 0.2                         | 0.7         | 1,530                  | 88.4                                     | 2.2                     | 0.1               | 32.5        |
| Sweden*                            | 2000-2014       | 813                | 0.0                         | 0.0        | 0.2         | 811               | 0.5                         | 5.7         | 761                    | 92.9                                     | 8.4                     | 0.5               | 0.1         |
| Swiss registries                   | 2000-2014       | 577                | 0.0                         | 0.0        | 0.3         | 575               | 0.0                         | 1.7         | 565                    | 85.7                                     | 0.4                     | 0.7               | 1.9         |
| United Kingdom*                    | 2000-2014       | 5,170              | 0.0                         | 0.0        | 0.0         | 5,168             | 0.2                         | 1.2         | 5,093                  | 95.0                                     | 4.9                     | 3.8               | 0.0         |
| <b>OCEANIA</b>                     |                 | <b>1,839</b>       | <b>0.4</b>                  | <b>0.0</b> | <b>0.4</b>  | <b>1,825</b>      | <b>0.4</b>                  | <b>5.7</b>  | <b>1,713</b>           | <b>92.8</b>                              | <b>7.4</b>              | <b>0.0</b>        | <b>0.0</b>  |
| Australia*                         | 2000-2014       | 1,567              | 0.4                         | 0.0        | 0.4         | 1,553             | 0.5                         | 3.9         | 1,484                  | 92.8                                     | 7.3                     | 0.0               | 0.0         |
| New Zealand*                       | 2000-2014       | 272                | 0.0                         | 0.0        | 0.0         | 272               | 0.0                         | 15.8        | 229                    | 93.0                                     | 7.9                     | 0.0               | 0.0         |
| <b>Total</b>                       |                 | <b>71,526</b>      | <b>0.6</b>                  | <b>0.0</b> | <b>0.8</b>  | <b>70,553</b>     | <b>1.1</b>                  | <b>2.9</b>  | <b>67,776</b>          | <b>94.0</b>                              | <b>5.5</b>              | <b>1.9</b>        | <b>2.4</b>  |

DCO: death certificate only. MV: microscopic verification. \* Data with 100% coverage of the national population. † Incomplete dates: records in which the year of birth is unknown; or the month or year of diagnosis is unknown; or the year of last known vital status is unknown. Other: records with incomplete data or for tumours that are metastatic from another organ (behaviour code 6), or unknown if primary or metastatic (behaviour code 9); or for patients with age outside the range 0–14 years (children); or other conditions. ‡ DCO: tumours registered only from a death certificate or detected at autopsy. Other: vital status or sex unknown; invalid date or sequence of dates; inconsistency of sex–site, site–morphology, age–site, age–morphology, or age–site–morphology. φ Non-specific morphology: ICD-O-3 morphology code in the range 8000–8005. Censored: patients whose last known vital status is "alive" and who were censored within 5 years of diagnosis.
