# Supplementary material for: Global survival trends for brain tumors, by histology: Analysis of individual records for 67,776 children diagnosed in 61 countries during 2000–2014 (CONCORD-3)
Source: PubMed Central journal article supplement — Neuro Oncol. 2022 Oct 10;25(3):593–606. doi: 10.1093/neuonc/noac232 (PMC10013647; doi:10.1093/neuonc/noac232), 2022-10-10
Supplement: noac232_suppl_supplementary_table_s3a.pdf [file noac232_suppl_supplementary_table_s3a.pdf]

Supplementary Table 3A. Age-standardised five-year net survival (%) with 95% confidence interval (CI), 2000-2014. Children (0-14 years) diagnosed with a brain tumour, by country, calendar period and histology group.

| Country                            | Period of diagnosis | Ependymoma    |              | Choroid plexus tumour |             | Astrocytoma, WHO grade I and II |               | Astrocytoma, WHO grade III and IV |             | Astrocytoma, unspecified |              | Medulloblastoma |             |
|------------------------------------|---------------------|---------------|--------------|-----------------------|-------------|---------------------------------|---------------|-----------------------------------|-------------|--------------------------|--------------|-----------------|-------------|
|                                    |                     | NS            | 95% CI       | NS                    | 95% CI      | NS                              | 95% CI        | NS                                | 95% CI      | NS                       | 95% CI       | NS              | 95% CI      |
| <b>AFRICA</b>                      |                     |               |              |                       |             |                                 |               |                                   |             |                          |              |                 |             |
| Algeria                            | 2000-2004           | -             | -            | -                     | -           | -                               | -             | -                                 | -           | -                        | -            | -               | -           |
|                                    | 2005-2009           | -             | -            | -                     | -           | -                               | -             | -                                 | -           | -                        | -            | -               | -           |
|                                    | 2010-2014           | -             | -            | -                     | -           | -                               | -             | -                                 | -           | -                        | -            | -               | -           |
| <b>AMERICA (CENTRAL AND SOUTH)</b> |                     |               |              |                       |             |                                 |               |                                   |             |                          |              |                 |             |
| Argentina*                         | 2000-2004           | <b>51.4</b>   | 38.8 - 63.9  | 67.8                  | 51.7 - 84.0 | <b>82.7</b>                     | 74.8 - 90.5   | <b>4.6</b>                        | 0.0 - 9.5   | <b>61.3</b>              | 51.1 - 71.5  | <b>48.2</b>     | 41.7 - 54.7 |
|                                    | 2005-2009           | <b>63.2</b>   | 51.8 - 74.7  | 65.0                  | 43.0 - 87.0 | <b>90.6</b>                     | 85.1 - 96.0   | <b>22.8</b>                       | 11.8 - 33.9 | <b>73.6</b>              | 65.9 - 81.2  | <b>51.1</b>     | 44.5 - 57.6 |
|                                    | 2010-2014           | <b>72.8</b> § | 62.3 - 83.4  | 79.9 §                | 61.8 - 98.0 | <b>87.5</b> §                   | 80.2 - 94.7   | <b>40.3</b> §                     | 25.8 - 54.9 | <b>76.3</b> §            | 69.2 - 83.5  | <b>57.5</b> §   | 49.9 - 65.0 |
| Brazil                             | 2000-2004           | -             | -            | -                     | -           | 92.3                            | 78.4 - 100.0  | -                                 | -           | 71.5                     | 48.8 - 94.2  | 50.1            | 27.9 - 72.3 |
|                                    | 2005-2009           | -             | -            | -                     | -           | -                               | -             | -                                 | -           | -                        | -            | 53.9            | 28.2 - 79.7 |
|                                    | 2010-2014           | -             | -            | -                     | -           | -                               | -             | -                                 | -           | -                        | -            | 39.6            | 15.1 - 64.1 |
| Colombia                           | 2000-2004           | -             | -            | -                     | -           | 72.9 §                          | 47.8 - 97.9   | 37.6 §                            | 8.7 - 66.5  | 61.8 §                   | 36.5 - 87.0  | -               | -           |
|                                    | 2005-2009           | -             | -            | -                     | -           | 63.8 §                          | 36.9 - 90.7   | -                                 | -           | -                        | -            | 16.8 §          | 0.0 - 33.9  |
|                                    | 2010-2014           | -             | -            | -                     | -           | 92.6 §                          | 78.6 - 100.0  | 0.0 §                             | 0.0 - 0.0   | 43.8 §                   | 13.3 - 74.3  | 45.4 §          | 15.9 - 74.9 |
| Costa Rica*                        | 2000-2004           | -             | -            | -                     | -           | -                               | -             | -                                 | -           | -                        | -            | -               | -           |
|                                    | 2005-2009           | 91.1          | 74.8 - 100.0 | -                     | -           | -                               | -             | -                                 | -           | -                        | -            | 33.4            | 8.8 - 58.0  |
|                                    | 2010-2014           | 91.0          | 74.8 - 100.0 | -                     | -           | 100.0                           | 100.0 - 100.0 | -                                 | -           | -                        | -            | 76.2            | 56.1 - 96.4 |
| Ecuador                            | 2000-2004           | -             | -            | -                     | -           | -                               | -             | -                                 | -           | 45.1 §                   | 15.3 - 74.9  | 46.3 §          | 21.3 - 71.4 |
|                                    | 2005-2009           | -             | -            | -                     | -           | -                               | -             | -                                 | -           | 50.0                     | 25.2 - 74.9  | 15.8            | 0.9 - 30.8  |
|                                    | 2010-2014           | -             | -            | -                     | -           | 65.8                            | 36.0 - 95.6   | -                                 | -           | 66.3                     | 43.2 - 89.4  | 31.9            | 6.8 - 57.1  |
| Puerto Rico*                       | 2000-2004           | -             | -            | -                     | -           | 97.4                            | 92.4 - 100.0  | -                                 | -           | -                        | -            | 58.4            | 32.0 - 84.8 |
|                                    | 2005-2009           | -             | -            | -                     | -           | 85.2                            | 75.2 - 95.2   | -                                 | -           | -                        | -            | 64.3            | 40.3 - 88.3 |
|                                    | 2010-2014           | -             | -            | -                     | -           | <b>84.2</b>                     | 67.6 - 100.0  | -                                 | -           | -                        | -            | -               | -           |
| <b>AMERICA (NORTH)</b>             |                     |               |              |                       |             |                                 |               |                                   |             |                          |              |                 |             |
| Canada                             | 2000-2004           | 81.0          | 64.6 - 97.4  | -                     | -           | <b>92.4</b>                     | 87.1 - 97.6   | 33.4                              | 11.0 - 55.7 | 58.4                     | 32.0 - 84.8  | 65.8            | 50.3 - 81.3 |
|                                    | 2005-2009           | 76.6          | 57.1 - 96.1  | -                     | -           | <b>93.9</b>                     | 89.3 - 98.6   | 23.6                              | 4.8 - 42.3  | 47.1                     | 24.4 - 69.8  | 74.3            | 60.1 - 88.6 |
|                                    | 2010-2014           | 81.8          | 63.5 - 100.0 | -                     | -           | <b>98.0</b>                     | 95.2 - 100.0  | 11.7                              | 0.8 - 22.6  | -                        | -            | <b>79.0</b>     | 67.7 - 90.4 |
| United States                      | 2000-2004           | <b>75.8</b>   | 71.3 - 80.3  | <b>75.8</b>           | 64.2 - 87.3 | <b>94.2</b>                     | 93.3 - 95.1   | <b>28.9</b>                       | 24.9 - 32.8 | <b>80.0</b>              | 75.2 - 84.8  | <b>72.7</b>     | 69.6 - 75.8 |
|                                    | 2005-2009           | <b>81.1</b>   | 76.7 - 85.4  | <b>89.1</b>           | 84.4 - 93.8 | <b>95.3</b>                     | 94.4 - 96.1   | <b>25.0</b>                       | 21.1 - 28.9 | <b>83.3</b>              | 78.8 - 87.9  | <b>72.3</b>     | 69.3 - 75.3 |
|                                    | 2010-2014           | <b>85.8</b>   | 81.8 - 89.9  | <b>93.5</b>           | 90.2 - 96.8 | <b>95.6</b>                     | 94.8 - 96.5   | <b>23.1</b>                       | 19.4 - 26.7 | <b>84.6</b>              | 80.3 - 88.9  | <b>73.7</b>     | 70.6 - 76.9 |
| <b>ASIA</b>                        |                     |               |              |                       |             |                                 |               |                                   |             |                          |              |                 |             |
| China                              | 2000-2004           | -             | -            | -                     | -           | -                               | -             | -                                 | -           | -                        | -            | -               | -           |
|                                    | 2005-2009           | -             | -            | -                     | -           | -                               | -             | -                                 | -           | -                        | -            | -               | -           |
|                                    | 2010-2014           | -             | -            | -                     | -           | -                               | -             | -                                 | -           | -                        | -            | 32.8            | 5.8 - 59.7  |
| Israel*                            | 2000-2004           | 83.4          | 63.1 - 100.0 | -                     | -           | <b>95.2</b>                     | 90.7 - 99.7   | 13.3                              | 0.0 - 28.4  | -                        | -            | <b>71.1</b>     | 60.4 - 81.7 |
|                                    | 2005-2009           | 80.1          | 64.7 - 95.4  | -                     | -           | <b>95.6</b>                     | 90.9 - 100.0  | 33.4                              | 16.2 - 50.5 | 100.0                    | 69.2 - 100.0 | 56.6            | 42.4 - 70.7 |
|                                    | 2010-2014           | 82.4          | 64.9 - 100.0 | -                     | -           | <b>95.4</b>                     | 90.4 - 100.0  | 47.1                              | 23.3 - 70.9 | -                        | -            | <b>81.0</b>     | 70.7 - 91.4 |

Supplementary Table 3A. Age-standardised five-year net survival (%) with 95% confidence interval (CI), 2000-2014. Children (0-14 years) diagnosed with a brain tumour, by country, calendar period and histology group.

| Country         | Period of diagnosis | Ependymoma  |               |  | Choroid plexus tumour |              |             | Astrocytoma, WHO grade I and II |              |             | Astrocytoma, WHO grade III and IV |             |             | Astrocytoma, unspecified |               | Medulloblastoma |             |
|-----------------|---------------------|-------------|---------------|--|-----------------------|--------------|-------------|---------------------------------|--------------|-------------|-----------------------------------|-------------|-------------|--------------------------|---------------|-----------------|-------------|
|                 |                     | NS          | 95% CI        |  | NS                    | 95% CI       |             | NS                              | 95% CI       |             | NS                                | 95% CI      |             | NS                       | 95% CI        | NS              | 95% CI      |
| Japan           | 2000-2004           | 56.3        | 33.0 - 79.6   |  |                       |              | 87.5        | 71.8 - 100.0                    |              | 13.1        | 0.5 - 25.6                        |             | 85.1        | 69.8 - 100.0             | 76.5          | 62.5 - 90.6     |             |
|                 | 2005-2009           | 49.2        | 25.6 - 72.9   |  | 88.2                  | 73.2 - 100.0 | <b>95.7</b> | 91.2 - 100.0                    |              | 9.4         | 0.1 - 18.7                        |             | 75.0        | 58.1 - 92.0              | <b>63.7</b>   | 53.2 - 74.2     |             |
|                 | 2010-2014           |             |               |  | 76.2                  | 49.2 - 100.0 | <b>96.5</b> | 91.8 - 100.0                    |              | 16.4        | 0.8 - 31.9                        |             |             |                          | <b>73.1</b>   | 61.0 - 85.1     |             |
| Jordan*         | 2000-2004           | 100.0 §     | 100.0 - 100.0 |  |                       |              | 89.0 §      | 69.6 - 100.0                    |              | 61.7 §      | 42.5 - 80.9                       |             | 78.4 §      | 60.1 - 96.8              | 78.2 §        | 64.9 - 91.5     |             |
|                 | 2005-2009           |             |               |  |                       |              | 79.1 §      | 61.3 - 96.9                     |              | 67.9 §      | 49.9 - 85.9                       |             | 80.1 §      | 60.6 - 99.6              | 69.4 §        | 56.7 - 82.2     |             |
|                 | 2010-2014           |             |               |  |                       |              | 82.9 §      | 69.3 - 96.4                     |              | 35.8 §      | 16.0 - 55.7                       |             |             |                          | <b>70.7</b> § | 56.8 - 84.7     |             |
| South Korea*    | 2000-2004           | <b>71.7</b> | 60.6 - 82.7   |  | 33.4                  | 8.8 - 58.0   | 93.8        | 82.3 - 100.0                    |              | <b>20.7</b> | 11.0 - 30.5                       |             | 83.8        | 73.5 - 94.0              | <b>60.5</b>   | 53.6 - 67.4     |             |
|                 | 2005-2009           | 72.6        | 58.9 - 86.2   |  |                       |              | 82.4        | 64.9 - 100.0                    |              | <b>21.3</b> | 11.5 - 31.1                       |             | <b>72.0</b> | 60.5 - 83.4              | <b>67.0</b>   | 59.5 - 74.5     |             |
|                 | 2010-2014           | <b>59.7</b> | 43.5 - 75.9   |  |                       |              | 83.1        | 62.6 - 100.0                    |              | <b>26.9</b> | 15.1 - 38.6                       |             | <b>66.7</b> | 54.4 - 78.9              | <b>70.0</b>   | 63.1 - 76.9     |             |
| Singapore*      | 2000-2004           |             |               |  |                       |              | 100.0       | 79.4 - 100.0                    |              |             |                                   |             |             |                          | 50.0          | 21.2 - 78.8     |             |
|                 | 2005-2009           |             |               |  |                       |              | 100.0       | 78.2 - 100.0                    |              |             |                                   |             |             |                          |               |                 |             |
|                 | 2010-2014           |             |               |  |                       |              | 94.5        | 84.2 - 100.0                    |              |             |                                   |             |             |                          |               |                 |             |
| Taiwan*         | 2000-2004           | 46.7        | 22.7 - 70.7   |  |                       |              | <b>91.4</b> | 84.4 - 98.3                     |              | 38.7        | 24.6 - 52.8                       |             | <b>82.8</b> | 73.2 - 92.5              | <b>56.4</b>   | 45.6 - 67.3     |             |
|                 | 2005-2009           | 80.0        | 56.6 - 100.0  |  |                       |              | 85.4        | 73.7 - 97.1                     |              | 30.6        | 16.0 - 45.2                       |             | 82.2        | 68.3 - 96.1              | <b>65.5</b>   | 55.9 - 75.0     |             |
|                 | 2010-2014           | 60.1        | 33.8 - 86.3   |  |                       |              | <b>84.1</b> | 74.1 - 94.0                     |              | <b>21.7</b> | 9.4 - 34.1                        |             | <b>70.6</b> | 53.8 - 87.3              | <b>62.7</b>   | 52.4 - 72.9     |             |
| Thailand        | 2000-2004           |             |               |  |                       |              |             |                                 |              | 13.4 §      | 0.0 - 28.4                        |             | 30.1 §      | 12.5 - 47.7              | 36.9 §        | 16.2 - 57.7     |             |
|                 | 2005-2009           |             |               |  |                       |              |             |                                 |              | 17.7        | 1.2 - 34.2                        |             | 41.8        | 22.9 - 60.7              | 50.2          | 33.2 - 67.2     |             |
|                 | 2010-2014           |             |               |  |                       |              |             |                                 |              |             |                                   |             |             |                          | <b>49.6</b> § | 32.8 - 66.3     |             |
| Turkey          | 2000-2004           |             |               |  |                       |              | 82.5        | 67.1 - 97.8                     |              |             |                                   |             |             |                          |               |                 |             |
|                 | 2005-2009           | 43.1        | 24.7 - 61.6   |  |                       |              | <b>83.3</b> | 75.4 - 91.3                     |              | 17.7        | 1.2 - 34.2                        |             | 90.9        | 79.2 - 100.0             | <b>53.1</b>   | 39.8 - 66.5     |             |
|                 | 2010-2014           | <b>54.0</b> | 36.3 - 71.7   |  |                       |              | <b>88.2</b> | 81.7 - 94.7                     |              | 34.5        | 19.2 - 49.8                       |             | 80.0        | 62.7 - 97.2              | <b>59.2</b>   | 46.8 - 71.5     |             |
| <b>EUROPE</b>   |                     |             |               |  |                       |              |             |                                 |              |             |                                   |             |             |                          |               |                 |             |
| Austria*        | 2000-2004           | 60.0        | 31.6 - 88.5   |  |                       |              |             |                                 |              | 17.4        | 3.0 - 31.8                        |             | 71.5        | 52.7 - 90.3              | 71.5          | 52.7 - 90.2     |             |
|                 | 2005-2009           |             |               |  |                       |              | 90.0        | 72.4 - 100.0                    |              | 21.7        | 5.9 - 37.6                        |             | 92.9        | 79.9 - 100.0             | 88.0          | 75.6 - 100.0    |             |
|                 | 2010-2014           | 100.0       | 100.0 - 100.0 |  | 50.0                  | 1.0 - 99.0   |             | 83.4                            | 56.1 - 100.0 |             | 35.4                              | 14.9 - 56.2 |             | 85.7                     | 72.8 - 98.5   | 82.6            | 67.4 - 97.6 |
| Belarus*        | 2000-2004           | 50.1        | 23.5 - 76.7   |  |                       |              | <b>78.1</b> | 68.4 - 87.7                     |              | 8.4         | 0.0 - 20.7                        |             |             |                          | 65.4          | 52.2 - 78.6     |             |
|                 | 2005-2009           | 58.9        | 36.4 - 81.5   |  |                       |              | <b>93.1</b> | 86.7 - 99.5                     |              | 30.0        | 5.3 - 54.7                        |             |             |                          | 52.4          | 31.8 - 73.1     |             |
|                 | 2010-2014           | 57.4        | 35.8 - 79.0   |  |                       |              | <b>92.4</b> | 86.1 - 98.6                     |              | 21.7        | 1.4 - 42.0                        |             | 100.0       |                          | <b>49.1</b>   | 30.8 - 67.4     |             |
| Belgium*        | 2000-2004           |             |               |  |                       |              | 95.3        | 86.4 - 100.0                    |              |             |                                   |             |             |                          |               |                 |             |
|                 | 2005-2009           |             |               |  | 70.7                  | 49.8 - 91.6  | <b>95.0</b> | 91.3 - 98.8                     |              | 17.4        | 3.0 - 31.8                        |             |             |                          | 57.2          | 42.4 - 71.9     |             |
|                 | 2010-2014           |             |               |  | 86.3                  | 69.1 - 100.0 | <b>94.7</b> | 90.8 - 98.5                     |              | 10.8        | 0.2 - 21.5                        |             |             |                          | <b>67.1</b>   | 54.9 - 79.3     |             |
| Croatia*        | 2000-2004           |             |               |  |                       |              | 81.8        | 60.2 - 100.0                    |              |             |                                   |             | 72.3        | 52.2 - 92.3              | 64.1          | 45.7 - 82.4     |             |
|                 | 2005-2009           |             |               |  |                       |              | 96.3        | 89.3 - 100.0                    |              |             |                                   |             | 80.0        | 60.5 - 99.5              | 53.4          | 29.3 - 77.4     |             |
|                 | 2010-2014           |             |               |  |                       |              | 93.4        | 81.2 - 100.0                    |              | 0.0         | 0.0 - 0.0                         |             |             |                          | 58.3          | 35.7 - 80.9     |             |
| Czech Republic* | 2000-2004           | 70.0        | 43.3 - 96.8   |  |                       |              | 87.3        | 76.9 - 97.6                     |              | 30.0        | 11.0 - 49.1                       |             |             |                          | 50.0          | 25.2 - 74.9     |             |
|                 | 2005-2009           |             |               |  |                       |              | <b>95.0</b> | 89.7 - 100.0                    |              | 10.0        | 0.0 - 24.6                        |             |             |                          |               |                 |             |
|                 | 2010-2014           |             |               |  |                       |              | <b>98.6</b> | 96.0 - 100.0                    |              | 15.7        | 0.0 - 31.4                        |             |             |                          | 87.9          | 72.6 - 100.0    |             |

Supplementary Table 3A. Age-standardised five-year net survival (%) with 95% confidence interval (CI), 2000-2014. Children (0-14 years) diagnosed with a brain tumour, by country, calendar period and histology group.

| Country      | Period of diagnosis | Ependymoma  |             | Choroid plexus tumour |               | Astrocytoma, WHO grade I and II |               | Astrocytoma, WHO grade III and IV |             | Astrocytoma, unspecified |               | Medulloblastoma |              |
|--------------|---------------------|-------------|-------------|-----------------------|---------------|---------------------------------|---------------|-----------------------------------|-------------|--------------------------|---------------|-----------------|--------------|
|              |                     | NS          | 95% CI      | NS                    | 95% CI        | NS                              | 95% CI        | NS                                | 95% CI      | NS                       | 95% CI        | NS              | 95% CI       |
| Denmark*     | 2000-2004           | -           | -           | -                     | -             | 95.4                            | 89.1 - 100.0  | -                                 | -           | 53.9                     | 28.2 - 79.6   | 65.5            | 48.7 - 82.4  |
|              | 2005-2009           | -           | -           | -                     | -             | 97.3                            | 92.1 - 100.0  | -                                 | -           | -                        | -             | 69.6            | 51.4 - 87.8  |
|              | 2010-2014           | -           | -           | -                     | -             | <b>95.2</b>                     | 87.2 - 100.0  | -                                 | -           | -                        | -             | <b>72.0</b>     | 59.4 - 84.6  |
| Estonia*     | 2000-2004           | -           | -           | -                     | -             | 100.0                           | 85.2 - 100.0  | -                                 | -           | -                        | -             | -               | -            |
|              | 2005-2009           | -           | -           | -                     | -             | 100.0                           | 73.5 - 100.0  | -                                 | -           | -                        | -             | -               | -            |
|              | 2010-2014           | -           | -           | -                     | -             | -                               | -             | -                                 | -           | -                        | -             | -               | -            |
| Finland*     | 2000-2004           | -           | -           | -                     | -             | <b>98.3</b>                     | 95.2 - 100.0  | 25.0                              | 2.9 - 47.1  | -                        | -             | 75.0            | 54.6 - 95.5  |
|              | 2005-2009           | -           | -           | -                     | -             | <b>98.6</b>                     | 96.0 - 100.0  | -                                 | -           | 56.3                     | 33.0 - 79.6   | 77.8            | 59.4 - 96.2  |
|              | 2010-2014           | -           | -           | 76.5                  | 48.6 - 100.0  | <b>97.0</b>                     | 92.9 - 100.0  | 9.2                               | 0.0 - 22.7  | -                        | -             | 62.5            | 42.4 - 82.6  |
| France*      | 2000-2004           | <b>68.6</b> | 57.7 - 79.6 | 61.9                  | 49.5 - 74.4   | <b>90.1</b>                     | 87.6 - 92.7   | 15.0                              | 4.5 - 25.6  | -                        | -             | <b>63.6</b>     | 58.4 - 68.8  |
|              | 2005-2009           | <b>82.3</b> | 73.8 - 90.7 | 86.1                  | 77.2 - 95.0   | <b>94.3</b>                     | 92.2 - 96.5   | <b>15.5</b>                       | 7.2 - 23.9  | -                        | -             | <b>68.6</b>     | 63.2 - 74.1  |
|              | 2010-2014           | <b>89.9</b> | 83.2 - 96.6 | <b>100.0</b>          | 100.0 - 100.0 | <b>94.2</b>                     | 91.5 - 96.9   | <b>6.3</b>                        | 0.1 - 12.5  | -                        | -             | <b>69.3</b>     | 62.8 - 75.8  |
| Germany      | 2000-2004           | -           | -           | -                     | -             | 85.3                            | 73.7 - 97.0   | 15.4                              | 0.0 - 31.1  | 68.8                     | 46.9 - 90.6   | 74.2            | 59.1 - 89.4  |
|              | 2005-2009           | -           | -           | -                     | -             | 94.7                            | 87.5 - 100.0  | 17.4                              | 3.1 - 31.8  | -                        | -             | 67.8            | 52.9 - 82.6  |
|              | 2010-2014           | -           | -           | -                     | -             | <b>100.0</b>                    | 100.0 - 100.0 | 32.1                              | 8.9 - 55.4  | -                        | -             | <b>75.5</b>     | 59.4 - 91.6  |
| Greece*      | 2000-2004           | -           | -           | -                     | -             | -                               | -             | -                                 | -           | -                        | -             | -               | -            |
|              | 2005-2009           | -           | -           | -                     | -             | -                               | -             | -                                 | -           | -                        | -             | -               | -            |
|              | 2010-2014           | -           | -           | -                     | -             | <b>91.8</b>                     | 82.1 - 100.0  | 43.2                              | 8.6 - 77.9  | -                        | -             | <b>54.8</b>     | 47.7 - 61.9  |
| Ireland*     | 2000-2004           | -           | -           | -                     | -             | 89.2                            | 80.3 - 98.1   | -                                 | -           | 76.5                     | 57.0 - 96.0   | -               | -            |
|              | 2005-2009           | 60.0        | 31.6 - 88.5 | -                     | -             | 92.9                            | 85.2 - 100.0  | -                                 | -           | -                        | -             | -               | -            |
|              | 2010-2014           | -           | -           | -                     | -             | <b>100.0</b>                    | 100.0 - 100.0 | 36.8                              | 8.3 - 65.3  | -                        | -             | 53.1            | 24.6 - 81.6  |
| Italy        | 2000-2004           | 74.3        | 59.1 - 89.4 | 75.1                  | 51.8 - 98.5   | <b>95.4</b>                     | 91.5 - 99.3   | 20.6                              | 7.8 - 33.4  | 77.8                     | 64.5 - 91.2   | <b>64.8</b>     | 55.1 - 74.4  |
|              | 2005-2009           | 81.3        | 69.8 - 92.9 | 78.7                  | 58.0 - 99.4   | <b>91.9</b>                     | 87.5 - 96.4   | 44.2                              | 29.7 - 58.8 | 67.8                     | 53.5 - 82.1   | <b>71.0</b>     | 63.0 - 79.1  |
|              | 2010-2014           | <b>80.8</b> | 69.7 - 91.8 | -                     | -             | <b>93.5</b>                     | 88.1 - 98.8   | <b>29.8</b>                       | 13.5 - 46.2 | <b>71.5</b>              | 53.9 - 89.1   | <b>69.7</b>     | 58.7 - 80.6  |
| Latvia*      | 2000-2004           | -           | -           | -                     | -             | -                               | -             | -                                 | -           | 80.2                     | 64.8 - 95.5   | -               | -            |
|              | 2005-2009           | -           | -           | -                     | -             | -                               | -             | -                                 | -           | -                        | -             | -               | -            |
|              | 2010-2014           | -           | -           | -                     | -             | -                               | -             | 55.4                              | 26.1 - 84.7 | 100.0                    | 100.0 - 100.0 | -               | -            |
| Lithuania*   | 2000-2004           | -           | -           | -                     | -             | -                               | -             | -                                 | -           | 66.8                     | 43.8 - 89.7   | 35.8            | 12.3 - 59.3  |
|              | 2005-2009           | -           | -           | -                     | -             | -                               | -             | -                                 | -           | -                        | -             | 45.5            | 18.1 - 73.0  |
|              | 2010-2014           | -           | -           | -                     | -             | -                               | -             | -                                 | -           | 75.0                     | 38.2 - 100.0  | -               | -            |
| Netherlands* | 2000-2004           | 71.7        | 56.3 - 87.0 | -                     | -             | <b>91.4</b>                     | 86.6 - 96.1   | 25.0                              | 12.1 - 38.0 | -                        | -             | <b>51.8</b>     | 41.6 - 62.0  |
|              | 2005-2009           | 78.6        | 57.9 - 99.2 | 75.1                  | 51.7 - 98.4   | <b>95.0</b>                     | 91.4 - 98.6   | 9.1                               | 0.1 - 18.1  | -                        | -             | <b>62.1</b>     | 52.2 - 72.0  |
|              | 2010-2014           | 80.4        | 61.1 - 99.6 | 88.7                  | 74.1 - 100.0  | <b>94.1</b>                     | 90.4 - 97.8   | 9.3                               | 0.1 - 18.5  | -                        | -             | <b>63.3</b>     | 52.4 - 74.2  |
| Norway*      | 2000-2004           | -           | -           | 82.0                  | 60.3 - 100.0  | <b>92.3</b>                     | 85.2 - 99.4   | -                                 | -           | -                        | -             | 72.3            | 52.2 - 92.3  |
|              | 2005-2009           | -           | -           | -                     | -             | 91.2                            | 83.0 - 99.4   | 0.0                               | 0.0 - 0.0   | 50.1                     | 21.3 - 78.8   | 87.5            | 71.8 - 100.0 |
|              | 2010-2014           | -           | -           | -                     | -             | <b>97.2</b>                     | 92.2 - 100.0  | 0.0                               | 0.0 - 0.0   | -                        | -             | -               | -            |
| Poland*      | 2000-2004           | 65.9        | 51.6 - 80.2 | -                     | -             | <b>86.5</b>                     | 79.6 - 93.4   | <b>31.3</b>                       | 20.1 - 42.5 | <b>72.4</b>              | 63.3 - 81.4   | <b>60.2</b>     | 52.7 - 67.6  |
|              | 2005-2009           | 71.1        | 56.9 - 85.3 | 80.1                  | 56.6 - 100.0  | <b>93.1</b>                     | 87.8 - 98.3   | <b>24.5</b>                       | 14.7 - 34.3 | <b>76.7</b>              | 67.0 - 86.3   | <b>54.8</b>     | 47.1 - 62.5  |
|              | 2010-2014           | <b>79.3</b> | 65.7 - 92.8 | 66.9                  | 44.0 - 89.9   | <b>95.1</b>                     | 89.7 - 100.0  | <b>31.2</b>                       | 19.1 - 43.3 | <b>83.1</b>              | 73.1 - 93.0   | <b>60.0</b>     | 51.9 - 68.1  |

Supplementary Table 3A. Age-standardised five-year net survival (%) with 95% confidence interval (CI), 2000-2014. Children (0-14 years) diagnosed with a brain tumour, by country, calendar period and histology group.

| Country            | Period of diagnosis | Ependymoma  |               | Choroid plexus tumour |               | Astrocytoma, WHO grade I and II |               | Astrocytoma, WHO grade III and IV |             | Astrocytoma, unspecified |              | Medulloblastoma |             |
|--------------------|---------------------|-------------|---------------|-----------------------|---------------|---------------------------------|---------------|-----------------------------------|-------------|--------------------------|--------------|-----------------|-------------|
|                    |                     | NS          | 95% CI        | NS                    | 95% CI        | NS                              | 95% CI        | NS                                | 95% CI      | NS                       | 95% CI       | NS              | 95% CI      |
| Portugal*          | 2000-2004           |             | -             |                       | -             | 86.5                            | 76.4 - 96.5   |                                   | -           | 60.1                     | 39.3 - 80.9  | 59.0            | 43.9 - 74.2 |
|                    | 2005-2009           | 45.5        | 18.1 - 72.9   |                       | -             | 90.3                            | 81.3 - 99.3   | 7.7                               | 0.0 - 19.1  | 88.3                     | 73.4 - 100.0 | 69.2            | 55.4 - 82.9 |
|                    | 2010-2014           |             | -             |                       | -             | <b>100.0</b>                    | 100.0 - 100.0 | 25.0                              | 0.0 - 56.9  |                          | -            | <b>80.6</b>     | 61.6 - 99.6 |
| Russian Federation | 2000-2004           |             | -             |                       | -             |                                 | -             |                                   | -           | 83.4                     | 69.0 - 97.8  |                 | -           |
|                    | 2005-2009           |             | -             |                       | -             |                                 | -             | 38.6                              | 13.8 - 63.3 | 74.6                     | 57.4 - 91.8  | 70.7            | 49.8 - 91.7 |
|                    | 2010-2014           |             | -             |                       | -             |                                 | -             | 40.2                              | 16.7 - 63.7 | <b>81.1</b>              | 65.8 - 96.4  | 66.1            | 43.0 - 89.3 |
| Slovakia*          | 2000-2004           |             | -             |                       | -             | <b>86.2</b>                     | 77.6 - 94.9   |                                   | -           |                          | -            | 47.9            | 28.1 - 67.7 |
|                    | 2005-2009           | 69.3        | 45.3 - 93.3   |                       | -             | 91.0                            | 82.6 - 99.4   |                                   | -           |                          | -            | 66.7            | 48.3 - 85.1 |
|                    | 2010-2014           |             | -             |                       | -             | <b>93.4</b>                     | 82.9 - 100.0  |                                   | -           |                          | -            |                 | -           |
| Slovenia*          | 2000-2004           |             | -             |                       | -             | 81.8                            | 60.2 - 100.0  |                                   | -           |                          | -            |                 | -           |
|                    | 2005-2009           |             | -             |                       | -             | 100.0                           | 78.2 - 100.0  |                                   | -           |                          | -            | 40.0            | 12.2 - 67.9 |
|                    | 2010-2014           |             | -             |                       | -             |                                 | -             |                                   | -           |                          | -            | 57.6            | 27.2 - 88.0 |
| Spain              | 2000-2004           | 35.7        | 12.3 - 59.2   |                       | -             | <b>91.8</b>                     | 85.0 - 98.5   |                                   | -           | 88.9                     | 77.3 - 100.0 | 54.8            | 40.0 - 69.6 |
|                    | 2005-2009           | 76.5        | 57.0 - 96.0   | 70.1                  | 43.3 - 96.9   | <b>84.0</b>                     | 76.1 - 91.9   | 16.7                              | 0.0 - 35.1  | 82.4                     | 64.9 - 100.0 | <b>56.4</b>     | 44.5 - 68.3 |
|                    | 2010-2014           | 100.0       | 100.0 - 100.0 |                       | -             | <b>86.3</b>                     | 75.6 - 97.0   |                                   | -           |                          | -            | <b>46.9</b>     | 29.3 - 64.4 |
| Sweden*            | 2000-2004           | 84.6        | 65.8 - 100.0  |                       | -             | <b>93.2</b>                     | 86.1 - 100.0  | 20.5                              | 0.0 - 42.3  | 85.0                     | 69.8 - 100.0 | 74.1            | 57.9 - 90.3 |
|                    | 2005-2009           | 100.0       | 73.5 - 100.0  |                       | -             | <b>98.2</b>                     | 94.7 - 100.0  | 20.0                              | 1.7 - 38.4  | 85.2                     | 72.1 - 98.3  | 65.2            | 46.4 - 84.1 |
|                    | 2010-2014           |             | -             | 100.0                 | 100.0 - 100.0 | <b>97.2</b>                     | 93.5 - 100.0  | 26.5                              | 7.7 - 45.3  | <b>80.6</b>              | 66.2 - 94.9  | <b>88.0</b>     | 77.8 - 98.3 |
| Switzerland*       | 2000-2004           |             | -             |                       | -             | <b>97.4</b>                     | 93.9 - 100.0  | 9.1                               | 0.0 - 22.4  |                          | -            | 66.7            | 50.9 - 82.5 |
|                    | 2005-2009           |             | -             |                       | -             | <b>92.0</b>                     | 83.8 - 100.0  | 54.6                              | 27.0 - 82.2 |                          | -            | 61.6            | 43.3 - 79.8 |
|                    | 2010-2014           |             | -             |                       | -             | <b>94.5</b>                     | 88.7 - 100.0  | 34.1                              | 10.3 - 57.9 |                          | -            | <b>63.0</b>     | 48.8 - 77.1 |
| United Kingdom*    | 2000-2004           | <b>65.1</b> | 54.4 - 75.8   | 58.9                  | 44.9 - 72.9   | <b>93.8</b>                     | 91.5 - 96.1   | <b>13.3</b>                       | 6.8 - 19.9  | <b>79.1</b>              | 70.6 - 87.7  | <b>68.8</b>     | 63.3 - 74.3 |
|                    | 2005-2009           | <b>79.1</b> | 71.0 - 87.2   | 81.2                  | 71.3 - 91.2   | <b>94.3</b>                     | 92.2 - 96.4   | <b>13.4</b>                       | 7.7 - 19.1  | <b>68.1</b>              | 55.8 - 80.4  | <b>65.0</b>     | 59.0 - 71.1 |
|                    | 2010-2014           | <b>81.3</b> | 72.2 - 90.5   | <b>90.6</b>           | 83.6 - 97.6   | <b>96.5</b>                     | 94.9 - 98.1   | <b>17.1</b>                       | 11.2 - 23.0 | <b>68.3</b>              | 54.8 - 81.9  | <b>61.5</b>     | 55.4 - 67.7 |
| <b>OCEANIA</b>     |                     |             |               |                       |               |                                 |               |                                   |             |                          |              |                 |             |
| Australia*         | 2000-2004           | 68.3        | 54.3 - 82.4   |                       | -             | <b>87.0</b>                     | 78.8 - 95.2   | <b>19.2</b>                       | 9.3 - 29.0  | 80.9                     | 66.0 - 95.7  | <b>69.4</b>     | 59.7 - 79.1 |
|                    | 2005-2009           | 79.5        | 61.9 - 97.0   | 73.5                  | 51.9 - 95.0   | <b>87.7</b>                     | 80.7 - 94.6   | <b>25.0</b>                       | 13.6 - 36.5 | 92.4                     | 78.4 - 100.0 | <b>64.8</b>     | 54.7 - 75.0 |
|                    | 2010-2014           | 76.7        | 59.1 - 94.2   | 58.5                  | 36.0 - 80.9   | <b>90.9</b>                     | 84.5 - 97.2   | <b>21.5</b>                       | 11.0 - 32.0 |                          | -            | <b>71.6</b>     | 61.6 - 81.6 |
| New Zealand*       | 2000-2004           |             | -             |                       | -             | 85.0                            | 69.8 - 100.0  |                                   | -           |                          | -            | 76.5            | 57.0 - 96.0 |
|                    | 2005-2009           |             | -             |                       | -             |                                 | -             | 16.7                              | 0.0 - 35.0  |                          | -            | 66.8            | 43.8 - 89.7 |
|                    | 2010-2014           |             | -             |                       | -             |                                 | -             |                                   | -           |                          | -            |                 | -           |

\* Countries with 100% coverage of the national population. § Survival estimates considered less reliable because the proportion of patients lost to follow-up or censored alive prior to five years, or the proportion of diagnoses based on a death certificate or autopsy, or the proportion of patients registered with incomplete dates, was 15% or more. Survival estimates in bold are age-standardised; survival estimates in italics are not age-standardised (see text).
