# Supplementary material for: Global survival trends for brain tumors, by histology: Analysis of individual records for 67,776 children diagnosed in 61 countries during 2000–2014 (CONCORD-3)
Source: PubMed Central journal article supplement — Neuro Oncol. 2022 Oct 10;25(3):593–606. doi: 10.1093/neuonc/noac232 (PMC10013647; doi:10.1093/neuonc/noac232), 2022-10-10
Supplement: noac232_suppl_supplementary_table_s3b.pdf [file noac232_suppl_supplementary_table_s3b.pdf]

Supplementary Table 3B. Age-standardised five-year net survival (%) with 95% confidence interval (CI), 2000-2014. Children (0-14 years) diagnosed with a brain tumour, by country, calendar period and histology group.

| Country                            | Period of diagnosis | Other and unspecified embryonal tumour |              |               | Oligodendroglial tumour |               | Unspecified glioma |             |             | Neuroepithelial glial tumour of uncertain origin |               | Neuronal and mixed neuronal-glial tumour |               | Unspecified neoplasm |             |             |
|------------------------------------|---------------------|----------------------------------------|--------------|---------------|-------------------------|---------------|--------------------|-------------|-------------|--------------------------------------------------|---------------|------------------------------------------|---------------|----------------------|-------------|-------------|
|                                    |                     | NS                                     | 95% CI       |               | NS                      | 95% CI        | NS                 | 95% CI      |             | NS                                               | 95% CI        | NS                                       | 95% CI        |                      |             |             |
| <b>AFRICA</b>                      |                     |                                        |              |               |                         |               |                    |             |             |                                                  |               |                                          |               |                      |             |             |
| Algeria                            | 2000-2004           | -                                      |              |               | -                       |               |                    | -           |             |                                                  | -             |                                          |               | -                    |             |             |
|                                    | 2005-2009           | -                                      |              |               | -                       |               |                    | -           |             |                                                  | -             |                                          |               | 47.9 §               | 28.2 - 67.6 |             |
|                                    | 2010-2014           | -                                      |              |               | -                       |               |                    | -           |             |                                                  | -             |                                          |               | 62.1 §               | 37.1 - 87.1 |             |
| <b>AMERICA (CENTRAL AND SOUTH)</b> |                     |                                        |              |               |                         |               |                    |             |             |                                                  |               |                                          |               |                      |             |             |
| Argentina*                         | 2000-2004           | <b>44.8</b>                            | 35.6 - 54.1  | 60.2          | 41.4 - 78.9             | 38.0          | 21.0 - 55.1        | -           |             |                                                  | 92.1          | 81.7 - 100.0                             | <b>16.7</b>   | 11.2 - 22.2          |             |             |
|                                    | 2005-2009           | <b>47.5</b>                            | 35.6 - 59.3  | 72.7          | 56.7 - 88.7             | 50.1          | 33.6 - 66.6        | -           |             |                                                  | 88.2          | 77.2 - 99.2                              | <b>26.7</b>   | 19.6 - 33.7          |             |             |
|                                    | 2010-2014           | <b>44.0 §</b>                          | 29.9 - 58.0  | <b>88.3 §</b> | 78.3 - 98.4             | <b>89.2 §</b> | 77.3 - 100.0       | -           |             |                                                  | <b>94.7 §</b> | 88.2 - 100.0                             | <b>37.6 §</b> | 28.8 - 46.4          |             |             |
| Brazil                             | 2000-2004           | -                                      |              |               | -                       |               |                    | -           |             |                                                  | -             |                                          |               | -                    |             |             |
|                                    | 2005-2009           | -                                      |              |               | -                       |               |                    | -           |             |                                                  | -             |                                          |               | -                    |             |             |
|                                    | 2010-2014           | -                                      |              |               | -                       |               |                    | -           |             |                                                  | -             |                                          |               | -                    |             |             |
| Colombia                           | 2000-2004           | -                                      |              |               | -                       |               |                    | -           |             |                                                  | -             |                                          |               | -                    |             |             |
|                                    | 2005-2009           | 22.9 §                                 | 0.0 - 46.8   | -             |                         |               | -                  |             |             | -                                                |               |                                          | -             |                      |             |             |
|                                    | 2010-2014           | 44.5 §                                 | 16.4 - 72.6  | -             |                         |               | -                  |             |             | -                                                |               |                                          | 30.3 §        | 3.4 - 57.3           |             |             |
| Costa Rica*                        | 2000-2004           | -                                      |              |               | -                       |               |                    | -           |             |                                                  | -             |                                          |               | -                    |             |             |
|                                    | 2005-2009           | -                                      |              |               | -                       |               |                    | -           |             |                                                  | -             |                                          |               | 77.9                 | 59.2 - 96.5 |             |
|                                    | 2010-2014           | -                                      |              |               | -                       |               |                    | -           |             |                                                  | -             |                                          |               | 71.8                 | 51.5 - 92.1 |             |
| Ecuador                            | 2000-2004           | -                                      |              |               | -                       |               |                    | -           |             |                                                  | -             |                                          |               | -                    |             |             |
|                                    | 2005-2009           | -                                      |              |               | -                       |               |                    | -           |             |                                                  | -             |                                          |               | 18.2                 | 0.0 - 38.0  |             |
|                                    | 2010-2014           | -                                      |              |               | -                       |               |                    | -           |             |                                                  | -             |                                          |               | 39.6                 | 19.0 - 60.2 |             |
| Puerto Rico*                       | 2000-2004           | 46.7                                   | 22.7 - 70.7  | -             |                         |               | -                  |             |             | -                                                |               |                                          | -             |                      |             |             |
|                                    | 2005-2009           | 80.2                                   | 56.7 - 100.0 | -             |                         |               | -                  |             |             | -                                                |               |                                          | -             |                      |             |             |
|                                    | 2010-2014           | -                                      |              |               | -                       |               |                    | -           |             |                                                  | -             |                                          |               | -                    |             |             |
| <b>AMERICA (NORTH)</b>             |                     |                                        |              |               |                         |               |                    |             |             |                                                  |               |                                          |               |                      |             |             |
| Canada                             | 2000-2004           | 41.5                                   | 26.7 - 56.3  | 72.7          | 47.8 - 97.7             | 59.3          | 41.2 - 77.4        | -           |             |                                                  | 100.0         | 79.4 - 100.0                             | -             |                      |             |             |
|                                    | 2005-2009           | 33.4                                   | 18.4 - 48.4  | -             |                         |               | 58.6               | 43.8 - 73.4 | -           |                                                  |               | 92.6                                     | 82.9 - 100.0  | -                    |             |             |
|                                    | 2010-2014           | <b>38.5</b>                            | 21.8 - 55.2  | -             |                         |               | <b>49.8</b>        | 36.2 - 63.3 | -           |                                                  |               | <b>96.7</b>                              | 90.8 - 100.0  | -                    |             |             |
| United States                      | 2000-2004           | <b>52.5</b>                            | 48.3 - 56.7  | <b>83.8</b>   | 78.9 - 88.7             | <b>48.6</b>   | 45.5 - 51.7        | 52.1        | 33.0 - 71.1 | <b>91.3</b>                                      | 86.6 - 96.1   | <b>56.1</b>                              | 46.2 - 65.9   |                      |             |             |
|                                    | 2005-2009           | <b>53.8</b>                            | 49.4 - 58.2  | <b>82.5</b>   | 76.7 - 88.2             | <b>52.9</b>   | 50.0 - 55.7        | 66.7        | 48.3 - 85.1 | <b>95.6</b>                                      | 94.0 - 97.1   | <b>81.0</b>                              | 76.4 - 85.5   |                      |             |             |
|                                    | 2010-2014           | <b>56.5</b>                            | 51.7 - 61.4  | <b>83.0</b>   | 76.1 - 89.9             | <b>56.8</b>   | 54.0 - 59.7        | <b>67.1</b> | 49.6 - 84.6 | <b>95.6</b>                                      | 93.9 - 97.2   | <b>86.7</b>                              | 82.6 - 90.7   |                      |             |             |
| <b>ASIA</b>                        |                     |                                        |              |               |                         |               |                    |             |             |                                                  |               |                                          |               |                      |             |             |
| China                              | 2000-2004           | -                                      |              |               | -                       |               |                    | -           |             |                                                  | -             |                                          |               | 19.1                 | 7.6 - 30.5  |             |
|                                    | 2005-2009           | -                                      |              |               | -                       |               |                    | 30.8        | 7.6 - 53.9  | -                                                |               |                                          | <b>27.2</b>   | 17.3 - 37.1          |             |             |
|                                    | 2010-2014           | -                                      |              |               | -                       |               |                    | -           |             |                                                  | -             |                                          |               | <b>35.8</b>          | 23.6 - 48.0 |             |
| Israel*                            | 2000-2004           | 52.5                                   | 31.8 - 73.1  | -             |                         |               | 42.5               | 26.0 - 58.9 | -           |                                                  |               | 83.4                                     | 63.3 - 100.0  | -                    |             |             |
|                                    | 2005-2009           | 51.7                                   | 34.5 - 68.9  | -             |                         |               | 53.2               | 39.2 - 67.3 | -           |                                                  |               | 92.6                                     | 82.9 - 100.0  | 71.5                 | 48.8 - 94.2 |             |
|                                    | 2010-2014           | <b>32.0</b>                            | 19.3 - 44.6  | -             |                         |               | <b>55.2</b>        | 40.0 - 70.4 | -           |                                                  |               | -                                        |               |                      | 69.9        | 42.6 - 97.2 |
| Japan                              | 2000-2004           | 56.3                                   | 33.0 - 79.6  | -             |                         |               | 20.7               | 6.7 - 34.7  | -           |                                                  |               | -                                        |               |                      | 84.4        | 72.1 - 96.7 |
|                                    | 2005-2009           | 46.4                                   | 33.0 - 59.8  | -             |                         |               | <b>31.0</b>        | 19.9 - 42.0 | -           |                                                  |               | 91.0                                     | 74.8 - 100.0  | 70.5                 | 56.6 - 84.4 |             |
|                                    | 2010-2014           | <b>48.1</b>                            | 41.4 - 54.8  | -             |                         |               | <b>33.4</b>        | 19.2 - 47.5 | -           |                                                  |               | 100.0                                    | 100.0 - 100.0 | <b>87.7</b>          | 77.3 - 98.2 |             |

Supplementary Table 3B. Age-standardised five-year net survival (%) with 95% confidence interval (CI), 2000-2014. Children (0-14 years) diagnosed with a brain tumour, by country, calendar period and histology group.

| Country         | Period of diagnosis | Other and unspecified embryonal tumour |               | Oligodendroglial tumour |              | Unspecified glioma |               | Neuroepithelial glial tumour of uncertain origin |        | Neuronal and mixed neuronal-glial tumour |              | Unspecified neoplasm |                |
|-----------------|---------------------|----------------------------------------|---------------|-------------------------|--------------|--------------------|---------------|--------------------------------------------------|--------|------------------------------------------|--------------|----------------------|----------------|
|                 |                     | NS                                     | 95% CI        | NS                      | 95% CI       | NS                 | 95% CI        | NS                                               | 95% CI | NS                                       | 95% CI       | NS                   | 95% CI         |
| Jordan*         | 2000-2004           | 54.0                                   | § 28.3 - 79.7 | -                       | -            | 50.0               | § 21.3 - 78.8 | -                                                | -      | -                                        | -            | -                    | -              |
|                 | 2005-2009           | 50.1                                   | § 29.0 - 71.3 | -                       | -            | 30.8               | § 7.6 - 54.0  | -                                                | -      | -                                        | -            | -                    | -              |
|                 | 2010-2014           | 31.5                                   | § 12.7 - 50.4 | -                       | -            | 18.6               | § 5.4 - 31.7  | -                                                | -      | -                                        | -            | 83.5                 | § 66.8 - 100.0 |
| South Korea*    | 2000-2004           | 52.4                                   | 41.2 - 63.5   | 92.3                    | 82.3 - 100.0 | 33.4               | 20.9 - 45.8   | -                                                | -      | -                                        | -            | 40.1                 | 32.7 - 47.5    |
|                 | 2005-2009           | 53.3                                   | 43.2 - 63.5   | 85.7                    | 68.1 - 100.0 | 41.4               | 32.3 - 50.6   | -                                                | -      | -                                        | -            | 64.2                 | 54.1 - 74.2    |
|                 | 2010-2014           | 55.5                                   | 45.8 - 65.2   | 73.4                    | 58.0 - 88.8  | 43.2               | 33.6 - 52.7   | -                                                | -      | -                                        | -            | 58.5                 | 45.1 - 72.0    |
| Singapore*      | 2000-2004           | -                                      | -             | -                       | -            | -                  | -             | -                                                | -      | -                                        | -            | -                    | -              |
|                 | 2005-2009           | -                                      | -             | -                       | -            | -                  | -             | -                                                | -      | -                                        | -            | -                    | -              |
|                 | 2010-2014           | -                                      | -             | -                       | -            | -                  | -             | -                                                | -      | -                                        | -            | -                    | -              |
| Taiwan*         | 2000-2004           | 38.8                                   | 25.4 - 52.2   | 76.7                    | 57.1 - 96.2  | -                  | -             | -                                                | -      | -                                        | -            | -                    | -              |
|                 | 2005-2009           | 57.5                                   | 46.9 - 68.1   | 57.2                    | 32.5 - 81.9  | 33.3               | 8.8 - 57.9    | -                                                | -      | -                                        | -            | -                    | -              |
|                 | 2010-2014           | 49.4                                   | 33.3 - 65.5   | -                       | -            | 12.1               | 0.0 - 28.9    | -                                                | -      | -                                        | -            | -                    | -              |
| Thailand        | 2000-2004           | -                                      | -             | -                       | -            | -                  | -             | -                                                | -      | -                                        | -            | 23.6                 | § 4.9 - 42.3   |
|                 | 2005-2009           | 43.9                                   | 20.8 - 67.0   | -                       | -            | 6.3                | 0.0 - 15.7    | -                                                | -      | -                                        | -            | 47.3                 | 23.2 - 71.4    |
|                 | 2010-2014           | 41.8                                   | § 19.9 - 63.7 | -                       | -            | 37.6               | § 13.0 - 62.2 | -                                                | -      | -                                        | -            | 30.8                 | § 7.0 - 54.6   |
| Turkey          | 2000-2004           | 21.2                                   | 0.0 - 43.6    | -                       | -            | 22.2               | 0.0 - 44.8    | -                                                | -      | -                                        | -            | -                    | -              |
|                 | 2005-2009           | 50.4                                   | 36.3 - 64.6   | -                       | -            | 40.9               | 28.1 - 53.8   | -                                                | -      | 91.0                                     | 74.8 - 100.0 | 64.2                 | 45.9 - 82.6    |
|                 | 2010-2014           | 47.6                                   | 35.7 - 59.5   | -                       | -            | 47.3               | 37.8 - 56.9   | -                                                | -      | 85.3                                     | 70.1 - 100.0 | 88.9                 | 79.2 - 98.6    |
| <b>EUROPE</b>   |                     |                                        |               |                         |              |                    |               |                                                  |        |                                          |              |                      |                |
| Austria*        | 2000-2004           | 72.1                                   | 54.9 - 89.3   | -                       | -            | 23.1               | 2.4 - 43.8    | -                                                | -      | -                                        | -            | 42.1                 | 20.9 - 63.3    |
|                 | 2005-2009           | 57.2                                   | 39.3 - 75.1   | -                       | -            | 52.0               | 33.0 - 71.0   | -                                                | -      | -                                        | -            | -                    | -              |
|                 | 2010-2014           | 64.6                                   | 48.2 - 81.1   | 80.0                    | 48.7 - 100.0 | 66.7               | 47.1 - 86.3   | -                                                | -      | -                                        | -            | 62.2                 | 30.4 - 94.0    |
| Belarus*        | 2000-2004           | 33.4                                   | 11.0 - 55.7   | 85.3                    | 72.2 - 98.5  | -                  | -             | -                                                | -      | -                                        | -            | -                    | -              |
|                 | 2005-2009           | 41.3                                   | 19.0 - 63.5   | 91.8                    | 76.8 - 100.0 | -                  | -             | -                                                | -      | -                                        | -            | 33.4                 | 12.7 - 54.0    |
|                 | 2010-2014           | 30.0                                   | 9.2 - 50.7    | -                       | -            | -                  | -             | -                                                | -      | -                                        | -            | 42.1                 | 21.2 - 63.1    |
| Belgium*        | 2000-2004           | -                                      | -             | -                       | -            | -                  | -             | -                                                | -      | -                                        | -            | -                    | -              |
|                 | 2005-2009           | 64.6                                   | 48.1 - 81.1   | 69.3                    | 45.3 - 93.3  | 68.1               | 50.3 - 85.9   | -                                                | -      | 100.0                                    | 80.5 - 100.0 | 90.9                 | 74.7 - 100.0   |
|                 | 2010-2014           | 65.6                                   | 50.1 - 81.1   | 75.7                    | 52.6 - 98.9  | 52.1               | 37.2 - 67.0   | -                                                | -      | 94.2                                     | 86.9 - 100.0 | 91.7                 | 76.7 - 100.0   |
| Croatia*        | 2000-2004           | 41.7                                   | 16.3 - 67.1   | -                       | -            | 81.8               | 60.1 - 100.0  | -                                                | -      | -                                        | -            | 63.2                 | 42.4 - 84.1    |
|                 | 2005-2009           | -                                      | -             | -                       | -            | -                  | -             | -                                                | -      | -                                        | -            | 60.0                 | 31.6 - 88.4    |
|                 | 2010-2014           | 69.9                                   | 46.0 - 93.7   | -                       | -            | 43.7               | 19.1 - 68.2   | -                                                | -      | -                                        | -            | -                    | -              |
| Czech Republic* | 2000-2004           | 50.0                                   | 25.2 - 74.9   | -                       | -            | -                  | -             | -                                                | -      | -                                        | -            | -                    | -              |
|                 | 2005-2009           | 23.1                                   | 7.8 - 38.4    | -                       | -            | -                  | -             | -                                                | -      | -                                        | -            | -                    | -              |
|                 | 2010-2014           | 31.1                                   | 15.6 - 46.5   | -                       | -            | -                  | -             | -                                                | -      | -                                        | -            | -                    | -              |
| Denmark*        | 2000-2004           | 18.8                                   | 1.5 - 36.1    | -                       | -            | -                  | -             | -                                                | -      | 93.4                                     | 81.2 - 100.0 | 66.7                 | 49.4 - 84.0    |
|                 | 2005-2009           | 53.0                                   | 30.2 - 75.7   | -                       | -            | -                  | -             | -                                                | -      | -                                        | -            | 83.4                 | 72.9 - 93.8    |
|                 | 2010-2014           | 62.3                                   | 37.6 - 87.1   | -                       | -            | -                  | -             | -                                                | -      | -                                        | -            | 88.3                 | 81.9 - 94.7    |

Supplementary Table 3B. Age-standardised five-year net survival (%) with 95% confidence interval (CI), 2000-2014. Children (0-14 years) diagnosed with a brain tumour, by country, calendar period and histology group.

| Country      | Period of diagnosis | Other and unspecified embryonal tumour |             |      | Oligodendroglial tumour |        | Unspecified glioma |        | Neuroepithelial glial tumour of uncertain origin |        | Neuronal and mixed neuronal-glial tumour |        | Unspecified neoplasm |        |
|--------------|---------------------|----------------------------------------|-------------|------|-------------------------|--------|--------------------|--------|--------------------------------------------------|--------|------------------------------------------|--------|----------------------|--------|
|              |                     | NS                                     | 95% CI      |      | NS                      | 95% CI | NS                 | 95% CI | NS                                               | 95% CI | NS                                       | 95% CI | NS                   | 95% CI |
| Estonia*     | 2000-2004           | -                                      | -           | -    | -                       | -      | -                  | -      | -                                                | -      | -                                        | -      | -                    | -      |
|              | 2005-2009           | -                                      | -           | -    | -                       | -      | -                  | -      | -                                                | -      | -                                        | -      | -                    | -      |
|              | 2010-2014           | -                                      | -           | -    | -                       | -      | -                  | -      | -                                                | -      | -                                        | -      | -                    | -      |
| Finland*     | 2000-2004           | 55.0                                   | 34.0 - 76.1 | -    | -                       | -      | -                  | -      | -                                                | 100.0  | 83.2 - 100.0                             | -      | -                    | -      |
|              | 2005-2009           | 57.2                                   | 32.5 - 81.8 | -    | -                       | -      | -                  | -      | -                                                | 100.0  | 79.4 - 100.0                             | -      | -                    | -      |
|              | 2010-2014           | 38.4                                   | 18.3 - 58.5 | -    | -                       | -      | -                  | -      | -                                                | 100.0  | 100.0 - 100.0                            | -      | -                    | -      |
| France*      | 2000-2004           | 40.7                                   | 30.7 - 50.8 | 54.5 | 45.8 - 63.2             | 20.1   | 13.8 - 26.4        | -      | -                                                | 95.0   | 91.7 - 98.2                              | 54.6   | 38.1 - 71.0          |        |
|              | 2005-2009           | 51.6                                   | 42.2 - 60.9 | 44.6 | 36.1 - 53.1             | 35.4   | 27.8 - 43.0        | -      | -                                                | 96.9   | 94.6 - 99.2                              | 56.7   | 39.7 - 73.7          |        |
|              | 2010-2014           | 48.6                                   | 35.9 - 61.2 | 51.3 | 38.7 - 64.0             | 30.9   | 22.6 - 39.2        | -      | -                                                | 95.3   | 92.2 - 98.5                              | -      | -                    |        |
| Germany      | 2000-2004           | 68.0                                   | 50.2 - 85.9 | -    | -                       | -      | -                  | -      | -                                                | -      | -                                        | -      | -                    |        |
|              | 2005-2009           | 62.5                                   | 46.1 - 79.0 | -    | -                       | 52.7   | 31.1 - 74.3        | -      | -                                                | -      | -                                        | -      | -                    |        |
|              | 2010-2014           | 84.5                                   | 74.8 - 94.3 | -    | -                       | 42.8   | 23.2 - 62.4        | -      | -                                                | -      | -                                        | -      | -                    |        |
| Greece*      | 2000-2004           | -                                      | -           | -    | -                       | -      | -                  | -      | -                                                | -      | -                                        | -      | -                    |        |
|              | 2005-2009           | -                                      | -           | -    | -                       | -      | -                  | -      | -                                                | -      | -                                        | -      | -                    |        |
|              | 2010-2014           | 43.8                                   | 25.2 - 62.5 | -    | -                       | 29.9   | 7.8 - 52.1         | -      | -                                                | 100.0  | 100.0 - 100.0                            | -      | -                    |        |
| Ireland*     | 2000-2004           | 45.5                                   | 25.4 - 65.6 | -    | -                       | -      | -                  | -      | -                                                | -      | -                                        | -      | -                    |        |
|              | 2005-2009           | 66.7                                   | 45.6 - 87.7 | -    | -                       | -      | -                  | -      | -                                                | -      | -                                        | -      | -                    |        |
|              | 2010-2014           | 55.6                                   | 30.2 - 81.0 | -    | -                       | -      | -                  | -      | -                                                | 80.0   | 48.7 - 100.0                             | -      | -                    |        |
| Italy        | 2000-2004           | 42.0                                   | 25.1 - 58.9 | 80.1 | 56.6 - 100.0            | 46.0   | 30.3 - 61.7        | -      | -                                                | 100.0  | 83.2 - 100.0                             | 58.4   | 49.0 - 67.8          |        |
|              | 2005-2009           | 49.6                                   | 34.9 - 64.2 | 77.0 | 55.0 - 98.9             | 42.0   | 26.3 - 57.8        | -      | -                                                | 100.0  | 100.0 - 100.0                            | 79.3   | 72.4 - 86.1          |        |
|              | 2010-2014           | 83.5                                   | 70.2 - 96.8 | -    | -                       | 60.9   | 42.8 - 78.9        | -      | -                                                | 96.3   | 89.9 - 100.0                             | 72.3   | 61.7 - 82.9          |        |
| Latvia*      | 2000-2004           | -                                      | -           | -    | -                       | -      | -                  | -      | -                                                | -      | -                                        | -      | -                    |        |
|              | 2005-2009           | -                                      | -           | -    | -                       | -      | -                  | -      | -                                                | -      | -                                        | -      | -                    |        |
|              | 2010-2014           | -                                      | -           | -    | -                       | -      | -                  | -      | -                                                | -      | -                                        | -      | -                    |        |
| Lithuania*   | 2000-2004           | -                                      | -           | -    | -                       | -      | -                  | -      | -                                                | -      | -                                        | -      | -                    |        |
|              | 2005-2009           | -                                      | -           | -    | -                       | -      | -                  | -      | -                                                | -      | -                                        | -      | -                    |        |
|              | 2010-2014           | -                                      | -           | -    | -                       | -      | -                  | -      | -                                                | -      | -                                        | -      | -                    |        |
| Netherlands* | 2000-2004           | 33.5                                   | 22.3 - 44.8 | 61.2 | 39.5 - 82.9             | 31.1   | 17.7 - 44.5        | -      | -                                                | 96.2   | 89.0 - 100.0                             | 41.7   | 16.2 - 67.1          |        |
|              | 2005-2009           | 40.5                                   | 26.7 - 54.2 | 60.0 | 31.6 - 88.5             | 20.4   | 9.5 - 31.3         | -      | -                                                | 91.4   | 83.5 - 99.2                              | 55.6   | 33.8 - 77.3          |        |
|              | 2010-2014           | 46.2                                   | 32.9 - 59.5 | -    | -                       | 32.1   | 19.1 - 45.0        | -      | -                                                | 94.8   | 89.3 - 100.0                             | 59.8   | 40.7 - 78.9          |        |
| Norway*      | 2000-2004           | 56.3                                   | 33.3 - 79.4 | -    | -                       | 45.5   | 18.4 - 72.5        | -      | -                                                | 94.4   | 84.2 - 100.0                             | 93.3   | 81.1 - 100.0         |        |
|              | 2005-2009           | 47.7                                   | 27.1 - 68.2 | -    | -                       | 58.4   | 32.0 - 84.8        | -      | -                                                | 100.0  | 75.3 - 100.0                             | 100.0  | 75.3 - 100.0         |        |
|              | 2010-2014           | 47.0                                   | 26.7 - 67.4 | -    | -                       | 41.5   | 18.4 - 64.5        | -      | -                                                | 100.0  | 100.0 - 100.0                            | -      | -                    |        |
| Poland*      | 2000-2004           | 56.2                                   | 45.6 - 66.8 | 87.0 | 73.6 - 100.0            | 64.8   | 42.9 - 86.7        | -      | -                                                | -      | -                                        | -      | -                    |        |
|              | 2005-2009           | 51.9                                   | 40.1 - 63.7 | 62.6 | 43.7 - 81.4             | 56.3   | 33.0 - 79.6        | -      | -                                                | -      | -                                        | -      | -                    |        |
|              | 2010-2014           | 52.6                                   | 39.7 - 65.4 | 72.4 | 56.9 - 87.9             | 75.9   | 57.6 - 94.2        | -      | -                                                | -      | -                                        | -      | -                    |        |
| Portugal*    | 2000-2004           | 54.6                                   | 27.0 - 82.2 | 54.6 | 27.0 - 82.3             | 52.7   | 31.1 - 74.3        | -      | -                                                | -      | -                                        | -      | -                    |        |
|              | 2005-2009           | 41.2                                   | 19.0 - 63.5 | 57.2 | 32.5 - 81.9             | 46.2   | 20.7 - 71.7        | -      | -                                                | -      | -                                        | -      | -                    |        |
|              | 2010-2014           | 64.1                                   | 28.6 - 99.6 | 50.0 | 1.0 - 99.1              | -      | -                  | -      | -                                                | 100.0  | 100.0 - 100.0                            | -      | -                    |        |

Supplementary Table 3B. Age-standardised five-year net survival (%) with 95% confidence interval (CI), 2000-2014. Children (0-14 years) diagnosed with a brain tumour, by country, calendar period and histology group.

| Country            | Period of diagnosis | Other and unspecified embryonal tumour |             |             | Oligodendroglial tumour |             | Unspecified glioma |        | Neuroepithelial glial tumour of uncertain origin |             | Neuronal and mixed neuronal-glial tumour |             | Unspecified neoplasm |        |
|--------------------|---------------------|----------------------------------------|-------------|-------------|-------------------------|-------------|--------------------|--------|--------------------------------------------------|-------------|------------------------------------------|-------------|----------------------|--------|
|                    |                     | NS                                     | 95% CI      |             | NS                      | 95% CI      | NS                 | 95% CI | NS                                               | 95% CI      | NS                                       | 95% CI      | NS                   | 95% CI |
| Russian Federation | 2000-2004           | -                                      | -           | -           | -                       | -           | -                  | -      | -                                                | -           | -                                        | -           | -                    | -      |
|                    | 2005-2009           | -                                      | -           | -           | -                       | -           | -                  | -      | -                                                | -           | -                                        | -           | -                    | -      |
|                    | 2010-2014           | 18.2                                   | 0.0 - 38.3  | -           | -                       | -           | -                  | -      | -                                                | -           | -                                        | -           | -                    | -      |
| Slovakia*          | 2000-2004           | 54.8                                   | 27.1 - 82.5 | -           | -                       | -           | -                  | -      | -                                                | -           | -                                        | 21.4        | 2.0 - 40.9           | -      |
|                    | 2005-2009           | 25.0                                   | 2.9 - 47.2  | -           | -                       | -           | -                  | -      | -                                                | -           | -                                        | 54.6        | 27.0 - 82.3          | -      |
|                    | 2010-2014           | -                                      | -           | -           | -                       | -           | -                  | -      | -                                                | -           | -                                        | -           | -                    | -      |
| Slovenia*          | 2000-2004           | -                                      | -           | -           | -                       | -           | -                  | -      | -                                                | -           | -                                        | -           | -                    | -      |
|                    | 2005-2009           | -                                      | -           | -           | -                       | -           | -                  | -      | -                                                | -           | -                                        | -           | -                    | -      |
|                    | 2010-2014           | -                                      | -           | -           | -                       | -           | -                  | -      | -                                                | -           | -                                        | -           | -                    | -      |
| Spain              | 2000-2004           | 14.3                                   | 0.6 - 28.0  | -           | -                       | 31.6        | 11.8 - 51.4        | -      | -                                                | -           | -                                        | 36.4        | 10.2 - 62.5          | -      |
|                    | 2005-2009           | 34.2                                   | 20.0 - 48.4 | -           | -                       | 37.5        | 18.9 - 56.2        | -      | -                                                | 80.1        | 60.6 - 99.6                              | -           | -                    | -      |
|                    | 2010-2014           | 38.0                                   | 14.3 - 61.6 | -           | -                       | -           | -                  | -      | -                                                | 80.1        | 48.7 - 100.0                             | -           | -                    | -      |
| Sweden*            | 2000-2004           | 51.7                                   | 34.5 - 68.8 | -           | -                       | -           | -                  | -      | -                                                | 90.9        | 74.7 - 100.0                             | 52.4        | 31.8 - 73.0          | -      |
|                    | 2005-2009           | 63.7                                   | 44.1 - 83.2 | -           | -                       | -           | -                  | -      | -                                                | 88.5        | 76.5 - 100.0                             | 52.2        | 32.4 - 72.0          | -      |
|                    | 2010-2014           | <b>58.3</b>                            | 39.1 - 77.5 | 60.6        | 27.9 - 93.4             | -           | -                  | -      | -                                                | <b>89.8</b> | 80.4 - 99.1                              | 58.9        | 39.0 - 78.7          | -      |
| Switzerland*       | 2000-2004           | 47.7                                   | 27.1 - 68.3 | -           | -                       | -           | -                  | -      | -                                                | 100.0       | 78.2 - 100.0                             | -           | -                    | -      |
|                    | 2005-2009           | 43.4                                   | 26.1 - 60.6 | -           | -                       | -           | -                  | -      | -                                                | 100.0       | 100.0 - 100.0                            | -           | -                    | -      |
|                    | 2010-2014           | 64.6                                   | 43.7 - 85.6 | -           | -                       | -           | -                  | -      | -                                                | -           | -                                        | -           | -                    | -      |
| United Kingdom*    | 2000-2004           | <b>53.1</b>                            | 42.6 - 63.6 | 58.1        | 39.7 - 76.6             | <b>37.8</b> | 30.3 - 45.3        | -      | -                                                | <b>98.1</b> | 94.4 - 100.0                             | <b>72.9</b> | 64.7 - 81.1          | -      |
|                    | 2005-2009           | <b>48.6</b>                            | 39.3 - 57.8 | 63.4        | 46.5 - 80.2             | <b>49.8</b> | 42.4 - 57.3        | -      | -                                                | <b>93.8</b> | 89.5 - 98.2                              | <b>62.7</b> | 51.9 - 73.4          | -      |
|                    | 2010-2014           | <b>53.5</b>                            | 44.2 - 62.8 | <b>70.4</b> | 59.7 - 81.2             | <b>49.4</b> | 41.8 - 57.0        | 54.6   | 27.0 - 82.2                                      | <b>97.0</b> | 94.2 - 99.9                              | <b>77.9</b> | 68.8 - 87.0          | -      |
| <b>OCEANIA</b>     |                     |                                        |             |             |                         |             |                    |        |                                                  |             |                                          |             |                      |        |
| Australia*         | 2000-2004           | <b>29.9</b>                            | 20.4 - 39.4 | 83.4        | 66.7 - 100.0            | <b>48.7</b> | 35.1 - 62.2        | -      | -                                                | 100.0       | 81.5 - 100.0                             | <b>69.3</b> | 57.2 - 81.4          | -      |
|                    | 2005-2009           | <b>48.4</b>                            | 36.7 - 60.2 | 81.9        | 60.2 - 100.0            | <b>32.4</b> | 21.2 - 43.7        | -      | -                                                | 85.8        | 71.2 - 100.0                             | 58.1        | 41.1 - 75.1          | -      |
|                    | 2010-2014           | <b>48.2</b>                            | 34.6 - 61.8 | 70.2        | 46.6 - 93.9             | <b>36.9</b> | 24.3 - 49.5        | -      | -                                                | <b>96.3</b> | 89.9 - 100.0                             | <b>89.2</b> | 78.6 - 99.8          | -      |
| New Zealand*       | 2000-2004           | -                                      | -           | -           | -                       | 30.8        | 7.6 - 53.9         | -      | -                                                | -           | -                                        | -           | -                    | -      |
|                    | 2005-2009           | -                                      | -           | -           | -                       | 30.8        | 7.6 - 53.9         | -      | -                                                | -           | -                                        | -           | -                    | -      |
|                    | 2010-2014           | 60.8                                   | 32.0 - 89.7 | -           | -                       | 44.1        | 23.1 - 65.1        | -      | -                                                | -           | -                                        | -           | -                    | -      |

\* Countries with 100% coverage of the national population. § Survival estimates considered less reliable because the proportion of patients lost to follow-up or censored alive prior to five years, or the proportion of diagnoses based on a death certificate or autopsy, or the proportion of patients registered with incomplete dates, was 15% or more. Survival estimates in bold are age-standardised; survival estimates in italics are not age-standardised (see text).
