# Supplementary material for: Global survival trends for brain tumors, by histology: Analysis of individual records for 67,776 children diagnosed in 61 countries during 2000–2014 (CONCORD-3)
Source: PubMed Central journal article supplement — Neuro Oncol. 2022 Oct 10;25(3):593–606. doi: 10.1093/neuonc/noac232 (PMC10013647; doi:10.1093/neuonc/noac232), 2022-10-10
Supplement: noac232_suppl_supplementary_table_s4.pdf [file noac232_suppl_supplementary_table_s4.pdf]

**Supplementary Table 4 . Age-standardised 5-year net survival (%) with 95% confidence interval (CI), 2000-2014. Children (0-14 years) diagnosed with astrocytoma (broad group), by country and calendar period.**

| Country                            | Period of diagnosis | Astrocytoma (broad group) |        |       |
|------------------------------------|---------------------|---------------------------|--------|-------|
|                                    |                     | NS                        | 95% CI |       |
| <b>AFRICA</b>                      |                     |                           |        |       |
| Algeria                            | 2000-2004           | -                         | -      | -     |
|                                    | 2005-2009           | 38.2 §                    | 14.4 - | 62.0  |
|                                    | 2010-2014           | -                         | -      | -     |
| <b>AMERICA (CENTRAL AND SOUTH)</b> |                     |                           |        |       |
| Argentina*                         | 2000-2004           | <b>54.9</b>               | 48.5 - | 61.3  |
|                                    | 2005-2009           | <b>70.9</b>               | 65.7 - | 76.1  |
|                                    | 2010-2014           | <b>74.1</b> §             | 68.8 - | 79.5  |
| Brazil                             | 2000-2004           | 62.9                      | 47.2 - | 78.6  |
|                                    | 2005-2009           | 22.3                      | 4.4 -  | 40.1  |
|                                    | 2010-2014           | -                         | -      | -     |
| Colombia                           | 2000-2004           | 58.9 §                    | 42.4 - | 75.3  |
|                                    | 2005-2009           | 42.5 §                    | 24.0 - | 60.9  |
|                                    | 2010-2014           | <b>55.7</b> §             | 40.5 - | 70.8  |
| Costa Rica*                        | 2000-2004           | -                         | -      | -     |
|                                    | 2005-2009           | 80.1                      | 56.6 - | 100.0 |
|                                    | 2010-2014           | 74.7                      | 55.8 - | 93.6  |
| Ecuador                            | 2000-2004           | 46.9 §                    | 22.9 - | 70.9  |
|                                    | 2005-2009           | 53.7                      | 35.7 - | 71.8  |
|                                    | 2010-2014           | 64.7                      | 46.4 - | 82.9  |
| Puerto Rico*                       | 2000-2004           | 87.3                      | 77.8 - | 96.7  |
|                                    | 2005-2009           | <b>79.9</b>               | 69.6 - | 90.3  |
|                                    | 2010-2014           | <b>79.3</b>               | 62.3 - | 96.2  |
| <b>AMERICA (NORTH)</b>             |                     |                           |        |       |
| Canada                             | 2000-2004           | <b>81.2</b>               | 74.3 - | 88.1  |
|                                    | 2005-2009           | <b>79.3</b>               | 72.5 - | 86.0  |
|                                    | 2010-2014           | <b>78.7</b>               | 71.8 - | 85.6  |
| United States                      | 2000-2004           | <b>82.6</b>               | 81.3 - | 83.9  |
|                                    | 2005-2009           | <b>83.7</b>               | 82.5 - | 85.0  |
|                                    | 2010-2014           | <b>82.6</b>               | 81.3 - | 84.0  |

**Supplementary Table 4 . Age-standardised 5-year net survival (%) with 95% confidence interval (CI), 2000-2014. Children (0-14 years) diagnosed with astrocytoma (broad group), by country and calendar period.**

| Country           | Period of diagnosis | Astrocytoma (broad group) |        |       |
|-------------------|---------------------|---------------------------|--------|-------|
|                   |                     | NS                        | 95% CI |       |
| <b>ASIA</b>       |                     |                           |        |       |
| <b>China</b>      | 2000-2004           | -                         | -      | -     |
|                   | 2005-2009           | 63.2                      | 42.2 - | 84.1  |
|                   | 2010-2014           | -                         | -      | -     |
| <b>Israel*</b>    | 2000-2004           | <b>83.9</b>               | 77.1 - | 90.8  |
|                   | 2005-2009           | <b>81.1</b>               | 73.9 - | 88.3  |
|                   | 2010-2014           | <b>87.4</b>               | 80.4 - | 94.3  |
| <b>Japan</b>      | 2000-2004           | <b>60.6</b>               | 49.6 - | 71.6  |
|                   | 2005-2009           | <b>67.9</b>               | 59.2 - | 76.5  |
|                   | 2010-2014           | <b>73.4</b>               | 63.6 - | 83.2  |
| <b>Jordan*</b>    | 2000-2004           | <b>72.1</b> §             | 59.9 - | 84.3  |
|                   | 2005-2009           | <b>74.2</b> §             | 63.2 - | 85.3  |
|                   | 2010-2014           | <b>64.2</b> §             | 52.0 - | 76.5  |
| <b>Korea*</b>     | 2000-2004           | <b>52.3</b>               | 43.8 - | 60.8  |
|                   | 2005-2009           | <b>49.9</b>               | 41.0 - | 58.8  |
|                   | 2010-2014           | <b>43.5</b>               | 34.4 - | 52.6  |
| <b>Singapore*</b> | 2000-2004           | 73.9                      | 56.4 - | 91.4  |
|                   | 2005-2009           | 88.9                      | 74.8 - | 100.0 |
|                   | 2010-2014           | <b>69.5</b>               | 53.9 - | 85.0  |
| <b>Taiwan*</b>    | 2000-2004           | <b>72.1</b>               | 64.9 - | 79.2  |
|                   | 2005-2009           | <b>65.8</b>               | 57.1 - | 74.5  |
|                   | 2010-2014           | <b>53.0</b>               | 43.5 - | 62.5  |
| <b>Thailand</b>   | 2000-2004           | 21.7 §                    | 9.1 -  | 34.3  |
|                   | 2005-2009           | 34.9                      | 21.4 - | 48.5  |
|                   | 2010-2014           | <b>44.8</b> §             | 28.6 - | 60.9  |
| <b>Turkey</b>     | 2000-2004           | 70.8                      | 54.9 - | 86.6  |
|                   | 2005-2009           | <b>75.6</b>               | 68.1 - | 83.1  |
|                   | 2010-2014           | <b>72.8</b>               | 65.8 - | 79.8  |

**Supplementary Table 4 . Age-standardised 5-year net survival (%) with 95% confidence interval (CI), 2000-2014. Children (0-14 years) diagnosed with astrocytoma (broad group), by country and calendar period.**

| Country                | Period of diagnosis | Astrocytoma (broad group) |        |       |
|------------------------|---------------------|---------------------------|--------|-------|
|                        |                     | NS                        | 95% CI |       |
| <b>EUROPE</b>          |                     |                           |        |       |
| <b>Austria*</b>        | 2000-2004           | <b>50.2</b>               | 37.2 - | 63.2  |
|                        | 2005-2009           | <b>57.5</b>               | 43.5 - | 71.4  |
|                        | 2010-2014           | <b>65.2</b>               | 53.1 - | 77.3  |
| <b>Belarus*</b>        | 2000-2004           | <b>67.8</b>               | 57.9 - | 77.6  |
|                        | 2005-2009           | <b>81.6</b>               | 72.8 - | 90.4  |
|                        | 2010-2014           | <b>82.2</b>               | 73.8 - | 90.5  |
| <b>Belgium*</b>        | 2000-2004           | <b>77.8</b>               | 62.5 - | 93.2  |
|                        | 2005-2009           | <b>81.0</b>               | 74.3 - | 87.8  |
|                        | 2010-2014           | <b>79.4</b>               | 73.1 - | 85.8  |
| <b>Croatia*</b>        | 2000-2004           | <b>72.8</b>               | 57.8 - | 87.7  |
|                        | 2005-2009           | <b>78.4</b>               | 67.3 - | 89.4  |
|                        | 2010-2014           | <b>71.7</b>               | 56.2 - | 87.3  |
| <b>Czech Republic*</b> | 2000-2004           | <b>66.0</b>               | 54.9 - | 77.1  |
|                        | 2005-2009           | <b>82.9</b>               | 74.6 - | 91.1  |
|                        | 2010-2014           | <b>83.9</b>               | 76.3 - | 91.5  |
| <b>Denmark*</b>        | 2000-2004           | <b>75.1</b>               | 64.7 - | 85.5  |
|                        | 2005-2009           | <b>89.2</b>               | 80.3 - | 98.1  |
|                        | 2010-2014           | <b>80.8</b>               | 67.1 - | 94.5  |
| <b>Estonia*</b>        | 2000-2004           | <b>95.9</b>               | 88.1 - | 100.0 |
|                        | 2005-2009           | <b>100.0</b>              | 76.8 - | 100.0 |
|                        | 2010-2014           |                           | -      |       |
| <b>Finland*</b>        | 2000-2004           | <b>84.5</b>               | 77.0 - | 92.0  |
|                        | 2005-2009           | <b>79.2</b>               | 70.5 - | 87.9  |
|                        | 2010-2014           | <b>79.7</b>               | 71.1 - | 88.4  |
| <b>France*</b>         | 2000-2004           | <b>84.8</b>               | 81.8 - | 87.8  |
|                        | 2005-2009           | <b>83.7</b>               | 80.5 - | 86.8  |
|                        | 2010-2014           | <b>79.7</b>               | 75.4 - | 83.9  |

**Supplementary Table 4 . Age-standardised 5-year net survival (%) with 95% confidence interval (CI), 2000-2014. Children (0-14 years) diagnosed with astrocytoma (broad group), by country and calendar period.**

| Country             | Period of diagnosis | Astrocytoma (broad group) |        |      |
|---------------------|---------------------|---------------------------|--------|------|
|                     |                     | NS                        | 95% CI |      |
| <b>Germany</b>      | 2000-2004           | <b>68.2</b>               | 56.7 - | 79.7 |
|                     | 2005-2009           | <b>69.3</b>               | 58.9 - | 79.8 |
|                     | 2010-2014           | <b>74.5</b>               | 62.4 - | 86.6 |
| <b>Greece*</b>      | 2000-2004           |                           | -      |      |
|                     | 2005-2009           |                           | -      |      |
|                     | 2010-2014           | <b>86.4</b>               | 75.5 - | 97.3 |
| <b>Ireland*</b>     | 2000-2004           | <b>83.7</b>               | 74.4 - | 93.0 |
|                     | 2005-2009           | <b>83.1</b>               | 73.7 - | 92.4 |
|                     | 2010-2014           | <b>88.4</b>               | 79.9 - | 96.9 |
| <b>Italy</b>        | 2000-2004           | <b>77.3</b>               | 71.1 - | 83.5 |
|                     | 2005-2009           | <b>79.4</b>               | 74.2 - | 84.5 |
|                     | 2010-2014           | <b>77.2</b>               | 69.8 - | 84.6 |
| <b>Latvia*</b>      | 2000-2004           | 78.3                      | 64.2 - | 92.4 |
|                     | 2005-2009           |                           | -      |      |
|                     | 2010-2014           | <b>80.5</b>               | 66.7 - | 94.3 |
| <b>Lithuania*</b>   | 2000-2004           | 61.6                      | 43.4 - | 79.9 |
|                     | 2005-2009           | 78.7                      | 58.0 - | 99.4 |
|                     | 2010-2014           |                           | -      |      |
| <b>Netherlands*</b> | 2000-2004           | <b>77.1</b>               | 71.0 - | 83.1 |
|                     | 2005-2009           | <b>78.7</b>               | 72.7 - | 84.7 |
|                     | 2010-2014           | <b>80.7</b>               | 75.1 - | 86.4 |
| <b>Norway*</b>      | 2000-2004           | <b>88.0</b>               | 80.4 - | 95.6 |
|                     | 2005-2009           | <b>68.4</b>               | 57.2 - | 79.5 |
|                     | 2010-2014           | <b>77.4</b>               | 67.4 - | 87.4 |
| <b>Poland*</b>      | 2000-2004           | <b>67.5</b>               | 61.6 - | 73.4 |
|                     | 2005-2009           | <b>66.2</b>               | 60.0 - | 72.4 |
|                     | 2010-2014           | <b>64.3</b>               | 56.7 - | 71.9 |
| <b>Portugal*</b>    | 2000-2004           | <b>68.9</b>               | 58.5 - | 79.3 |
|                     | 2005-2009           | <b>75.3</b>               | 66.1 - | 84.4 |
|                     | 2010-2014           | <b>66.7</b>               | 43.2 - | 90.2 |

**Supplementary Table 4 . Age-standardised 5-year net survival (%) with 95% confidence interval (CI), 2000-2014. Children (0-14 years) diagnosed with astrocytoma (broad group), by country and calendar period.**

| Country                    | Period of diagnosis | Astrocytoma (broad group) |        |      |
|----------------------------|---------------------|---------------------------|--------|------|
|                            |                     | NS                        | 95% CI |      |
| <b>Russian Federation*</b> | 2000-2004           | <i>82.4</i>               | 69.9 - | 95.0 |
|                            | 2005-2009           | <i>65.4</i>               | 50.9 - | 79.9 |
|                            | 2010-2014           | <b>65.6</b>               | 51.1 - | 80.2 |
| <b>Slovakia*</b>           | 2000-2004           | <b>83.5</b>               | 74.5 - | 92.5 |
|                            | 2005-2009           | <b>80.9</b>               | 71.4 - | 90.5 |
|                            | 2010-2014           | <b>84.8</b>               | 70.1 - | 99.5 |
| <b>Slovenia*</b>           | 2000-2004           | <i>80.0</i>               | 60.5 - | 99.5 |
|                            | 2005-2009           | <i>81.8</i>               | 66.1 - | 97.5 |
|                            | 2010-2014           |                           | -      |      |
| <b>Spain</b>               | 2000-2004           | <b>86.7</b>               | 80.1 - | 93.3 |
|                            | 2005-2009           | <b>76.5</b>               | 68.6 - | 84.3 |
|                            | 2010-2014           | <b>77.7</b>               | 66.3 - | 89.2 |
| <b>Sweden*</b>             | 2000-2004           | <b>85.5</b>               | 78.2 - | 92.9 |
|                            | 2005-2009           | <b>82.7</b>               | 75.3 - | 90.0 |
|                            | 2010-2014           | <b>82.9</b>               | 76.0 - | 89.8 |
| <b>Switzerland*</b>        | 2000-2004           | <b>86.1</b>               | 78.9 - | 93.3 |
|                            | 2005-2009           | <b>86.4</b>               | 77.7 - | 95.0 |
|                            | 2010-2014           | <b>83.6</b>               | 75.2 - | 91.9 |
| <b>United Kingdom*</b>     | 2000-2004           | <b>77.8</b>               | 74.6 - | 81.0 |
|                            | 2005-2009           | <b>77.6</b>               | 74.4 - | 80.8 |
|                            | 2010-2014           | <b>78.9</b>               | 75.8 - | 82.0 |
| <b>OCEANIA</b>             |                     |                           |        |      |
| <b>Australia*</b>          | 2000-2004           | <b>60.6</b>               | 52.5 - | 68.8 |
|                            | 2005-2009           | <b>64.2</b>               | 56.7 - | 71.7 |
|                            | 2010-2014           | <b>65.5</b>               | 57.4 - | 73.5 |
| <b>New Zealand*</b>        | 2000-2004           | <i>67.8</i>               | 51.6 - | 83.9 |
|                            | 2005-2009           | <i>31.3</i>               | 10.0 - | 52.5 |
|                            | 2010-2014           | <i>46.4</i>               | 17.1 - | 75.6 |

\* Countries with 100% coverage of the national population. § Survival estimates considered less reliable because the proportion of patients lost to follow-up or censored alive prior to five years, and/or the proportion of diagnoses based on a death certificate or autopsy, and/or the proportion of patients registered with incomplete dates, was 15% or more. Survival estimates in bold are age-standardised; survival estimates in italics are not age-standardised.
