# Supplementary material for: Global survival trends for brain tumors, by histology: Analysis of individual records for 67,776 children diagnosed in 61 countries during 2000–2014 (CONCORD-3)
Source: PubMed Central journal article supplement — Neuro Oncol. 2022 Oct 10;25(3):593–606. doi: 10.1093/neuonc/noac232 (PMC10013647; doi:10.1093/neuonc/noac232), 2022-10-10
Supplement: noac232_suppl_supplementary_table_s5.pdf [file noac232_suppl_supplementary_table_s5.pdf]

Supplementary Table 5 . Age-standardised 10-year net survival (%) with 95% confidence interval (CI), 2000-2004. Children (0-14 years) diagnosed with low-grade astrocytoma (WHO grade I and II) or medulloblastoma, by country.

| Country                            | Period of diagnosis | Astrocytoma, WHO grade I and II |               | Astrocytoma, WHO grade III and IV |             | Medulloblastoma |             |
|------------------------------------|---------------------|---------------------------------|---------------|-----------------------------------|-------------|-----------------|-------------|
|                                    |                     | NS                              | 95% CI        | NS                                | 95% CI      | NS              | 95% CI      |
| <b>AMERICA (CENTRAL AND SOUTH)</b> |                     |                                 |               |                                   |             |                 |             |
| Argentina*                         | 2000-2004           | <b>79.6</b>                     | 71.2 - 87.9   | <b>4.6</b>                        | 0.0 - 9.5   | <b>44.1</b>     | 37.6 - 50.6 |
| Brazil                             | 2000-2004           | 92.9                            | 78.9 - 100.0  | -                                 | -           | 50.3            | 28.0 - 72.6 |
| Colombia                           | 2000-2004           | 60.9 §                          | 32.0 - 89.7   | 0.0 §                             | 0.0 - 0.0   | -               | -           |
| Ecuador                            | 2000-2004           | -                               | -             | -                                 | -           | 46.4 §          | 21.3 - 71.5 |
| Puerto Rico*                       | 2000-2004           | 94.9                            | 87.9 - 100.0  | -                                 | -           | 58.4            | 32.0 - 84.8 |
| <b>AMERICA (NORTH)</b>             |                     |                                 |               |                                   |             |                 |             |
| Canada                             | 2000-2004           | <b>92.4</b>                     | 87.2 - 97.6   | 33.4                              | 11.0 - 55.8 | 65.8            | 50.4 - 81.3 |
| United States                      | 2000-2004           | <b>93.9</b>                     | 92.9 - 94.8   | <b>28.0</b>                       | 24.1 - 31.9 | <b>71.4</b>     | 68.2 - 74.5 |
| <b>ASIA</b>                        |                     |                                 |               |                                   |             |                 |             |
| Israel*                            | 2000-2004           | 93.5                            | 88.3 - 98.6   | 13.3                              | 0.0 - 28.4  | <b>63.9</b>     | 53.1 - 74.8 |
| Japan                              | 2000-2004           | 80.9                            | 61.9 - 99.8   | 13.1                              | 0.5 - 25.7  | 64.4            | 48.5 - 80.4 |
| Jordan*                            | 2000-2004           | 74.3 §                          | 45.1 - 100.0  | 61.7 §                            | 42.5 - 80.9 | 75.5 §          | 61.6 - 89.3 |
| Korea*                             | 2000-2004           | 93.8                            | 82.3 - 100.0  | <b>20.7</b>                       | 11.0 - 30.5 | <b>56.5</b>     | 49.4 - 63.5 |
| Singapore*                         | 2000-2004           | -                               | -             | -                                 | -           | 40.0            | 12.2 - 67.9 |
| Taiwan*                            | 2000-2004           | <b>88.9</b>                     | 80.5 - 97.3   | 31.9                              | 18.4 - 45.3 | <b>46.2</b>     | 35.2 - 57.3 |
| Thailand                           | 2000-2004           | -                               | -             | 13.4 §                            | 0.0 - 28.4  | 31.8 §          | 11.9 - 51.7 |
| <b>EUROPE</b>                      |                     |                                 |               |                                   |             |                 |             |
| Austria*                           | 2000-2004           | -                               | -             | 17.4                              | 3.0 - 31.8  | 66.7            | 47.1 - 86.3 |
| Belarus*                           | 2000-2004           | <b>75.0</b>                     | 64.9 - 85.1   | 8.4                               | 0.0 - 20.7  | 57.4            | 43.6 - 71.1 |
| Belgium*                           | 2000-2004           | 85.8                            | 71.2 - 100.0  | -                                 | -           | -               | -           |
| Croatia*                           | 2000-2004           | 72.8                            | 47.8 - 97.8   | -                                 | -           | 56.1            | 37.2 - 75.1 |
| Czech Republic*                    | 2000-2004           | 84.7                            | 73.5 - 95.9   | 20.0                              | 3.7 - 36.4  | 42.9            | 18.5 - 67.4 |
| Denmark*                           | 2000-2004           | 93.1                            | 85.6 - 100.0  | -                                 | -           | 62.2            | 44.9 - 79.4 |
| Estonia*                           | 2000-2004           | 100.0                           | 100.0 - 100.0 | -                                 | -           | -               | -           |

Supplementary Table 5 . Age-standardised 10-year net survival (%) with 95% confidence interval (CI), 2000-2004. Children (0-14 years) diagnosed with low-grade astrocytoma (WHO grade I and II) or medulloblastoma, by country.

| Country         | Period of diagnosis | Astrocytoma, WHO grade I and II |              | Astrocytoma, WHO grade III and IV |             | Medulloblastoma |             |
|-----------------|---------------------|---------------------------------|--------------|-----------------------------------|-------------|-----------------|-------------|
|                 |                     | NS                              | 95% CI       | NS                                | 95% CI      | NS              | 95% CI      |
| Finland*        | 2000-2004           | 97.1                            | 93.0 - 100.0 | 25.0                              | 2.9 - 47.1  | 68.8            | 47.0 - 90.7 |
| France*         | 2000-2004           | <b>87.3</b>                     | 84.3 - 90.2  | 10.0                              | 1.3 - 18.7  | <b>55.6</b>     | 50.1 - 61.1 |
| Germany         | 2000-2004           | 82.5                            | 69.9 - 95.1  | 7.7                               | 0.0 - 18.7  | 64.6            | 48.1 - 81.1 |
| Ireland*        | 2000-2004           | 87.1                            | 77.5 - 96.8  | -                                 | -           | -               | -           |
| Italy           | 2000-2004           | <b>94.8</b>                     | 90.6 - 98.9  | 17.7                              | 5.6 - 29.7  | <b>59.8</b>     | 49.6 - 69.9 |
| Lithuania*      | 2000-2004           | -                               | -            | -                                 | -           | 35.9            | 12.3 - 59.5 |
| Netherlands*    | 2000-2004           | <b>90.1</b>                     | 85.2 - 95.1  | 25.0                              | 12.1 - 38.0 | <b>48.5</b>     | 37.9 - 59.1 |
| Norway*         | 2000-2004           | <b>92.3</b>                     | 85.2 - 99.4  | -                                 | -           | 66.8            | 45.7 - 87.8 |
| Poland*         | 2000-2004           | <b>84.3</b>                     | 76.9 - 91.8  | <b>27.6</b>                       | 16.7 - 38.5 | <b>53.7</b>     | 46.0 - 61.3 |
| Portugal*       | 2000-2004           | 84.2                            | 73.6 - 94.9  | -                                 | -           | 54.0            | 38.6 - 69.3 |
| Slovakia*       | 2000-2004           | <b>84.3</b>                     | 75.2 - 93.5  | -                                 | -           | 34.9            | 16.2 - 53.7 |
| Slovenia*       | 2000-2004           | 81.8                            | 60.2 - 100.0 | -                                 | -           | -               | -           |
| Spain           | 2000-2004           | <b>90.0</b>                     | 82.6 - 97.4  | -                                 | -           | 50.1            | 35.2 - 65.0 |
| Sweden*         | 2000-2004           | 95.6                            | 90.6 - 100.0 | 20.5                              | 0.0 - 42.3  | 74.1            | 57.9 - 90.3 |
| Switzerland*    | 2000-2004           | <b>95.1</b>                     | 89.6 - 100.0 | 9.1                               | 0.0 - 22.4  | 60.4            | 44.0 - 76.9 |
| United Kingdom* | 2000-2004           | <b>92.9</b>                     | 90.4 - 95.4  | <b>11.3</b>                       | 5.1 - 17.4  | <b>59.3</b>     | 53.4 - 65.2 |
| <b>OCEANIA</b>  |                     |                                 |              |                                   |             |                 |             |
| Australia*      | 2000-2004           | <b>84.0</b>                     | 75.0 - 92.9  | <b>16.3</b>                       | 7.1 - 25.5  | <b>68.6</b>     | 58.8 - 78.4 |
| New Zealand*    | 2000-2004           | 80.1                            | 63.0 - 97.1  | -                                 | -           | 70.7            | 49.8 - 91.7 |

\* Countries with 100% coverage of the national population. § Survival estimates considered less reliable because the proportion of patients lost to follow-up or censored alive prior to five years, and/or the proportion of diagnoses based on a death certificate or autopsy, and/or the proportion of patients registered with incomplete dates, was 15% or more. Survival estimates in bold are age-standardised; survival estimates in italics are not age-standardised.
